# Supplementary material
Source: PubMed Central journal article supplement (PMC8092023)
Supplement: NIHMS1678877-supplement-Supplementary_Materials.pdf [file NIHMS1678877-supplement-Supplementary_Materials.pdf]

# Supplementary Materials for

## **Trimetaphosphate activates prebiotic peptide synthesis**

### **across a wide range of temperature and pH**

Izabela Sibilska, Yu Feng, Lingjun Li, John Yin\*.

\*Correspondence to: john.yin@wisc.edu

#### **This file includes:**

Fig. S1. Reproducibility of the experiment

Fig. S2- S8. Ion pairing HPLC chromatograms of an alanine and glycine condensation reaction in the absence of TP at different temperatures as a function of pH.

Fig. S9- S20. Ion pairing HPLC chromatograms of an alanine and glycine condensation reaction in the absence of TP at different pH as a function of temperature.

Fig. S21-S31. Ion pairing HPLC chromatograms of an alanine and glycine condensation reaction in the presence of TP at different temperatures as a function of pH.

Fig. S32-S43. Ion pairing HPLC chromatograms of an alanine and glycine condensation reaction in the presence of TP at different pH as a function of temperature.

Fig. S44- S56. Mass spectra for obtained oligomers.

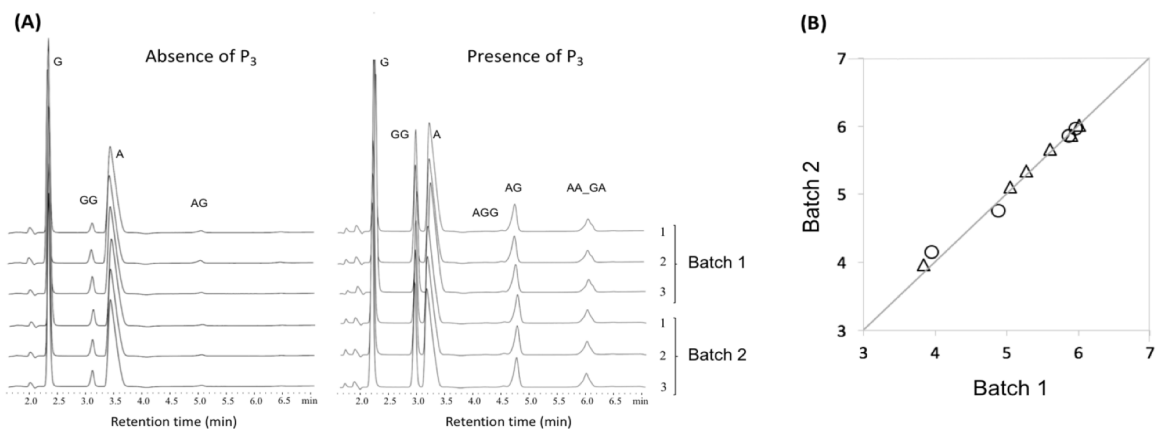

**Figure S1. Reproducibility of experiments.** Reactions were performed with three replicates per batch, with batches run on two different days. **(A)** HPLC product profiles are shown for reactions run in the absence and presence of trimetaphosphate (TP). The **(B)** concentrations for each peptide species were determined and plotted for batch 2 versus batch 1 in the absence (circles) and presence (triangles) of TP. Reactions of glycine and alanine were carried out at pH and 60°C, and concentrations are  $\log_{10}(\mu\text{M})$ ; for example, a value of 4 corresponds to  $10^4 \mu\text{M}$  or 10 mM.

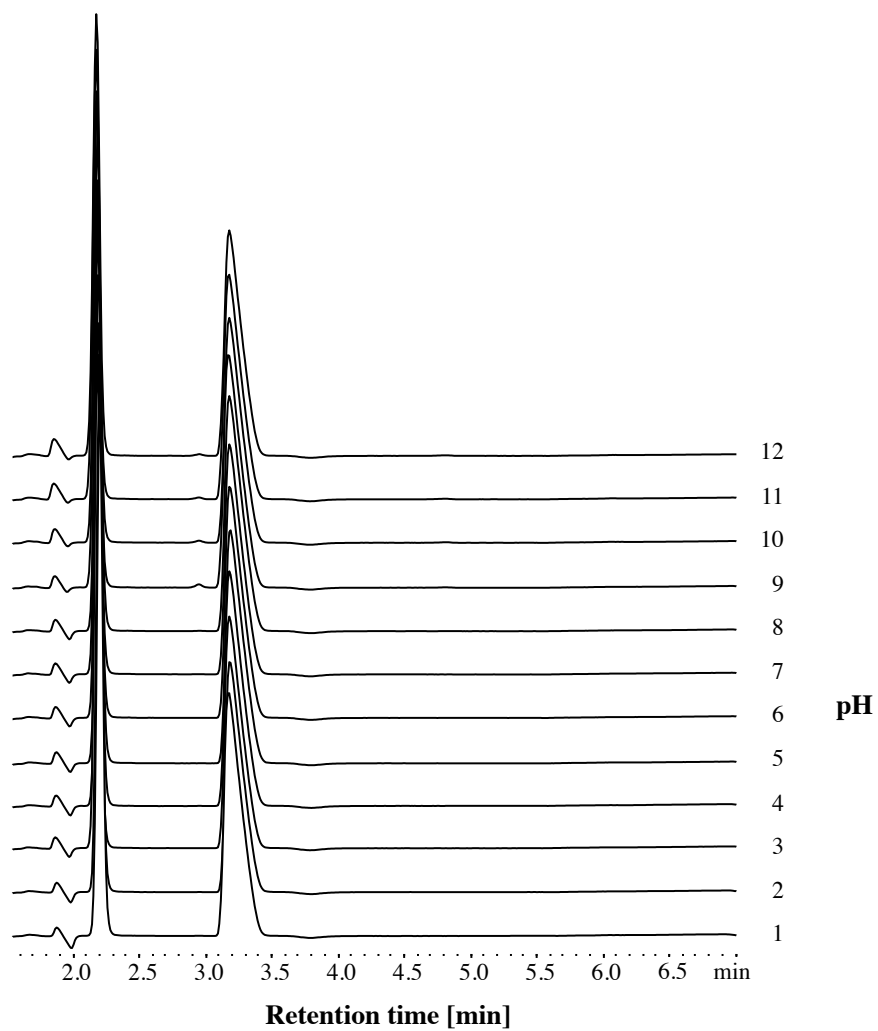

**Fig. S2.** Ion pairing HPLC chromatograms of an alanine and glycine condensation reaction in the absence of TP at 40°C as a function of pH.

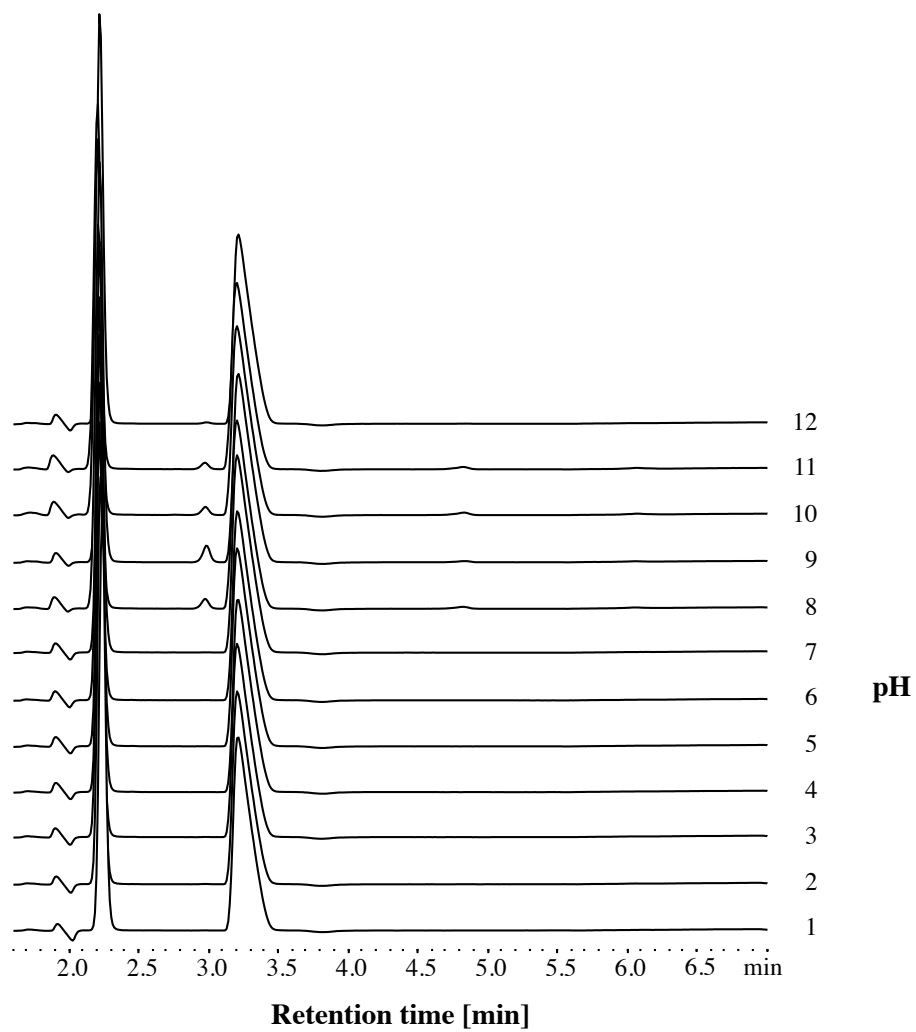

**Fig. S3.** Ion pairing HPLC chromatograms of an alanine and glycine condensation reaction in the absence of TP at 50°C as a function of pH.

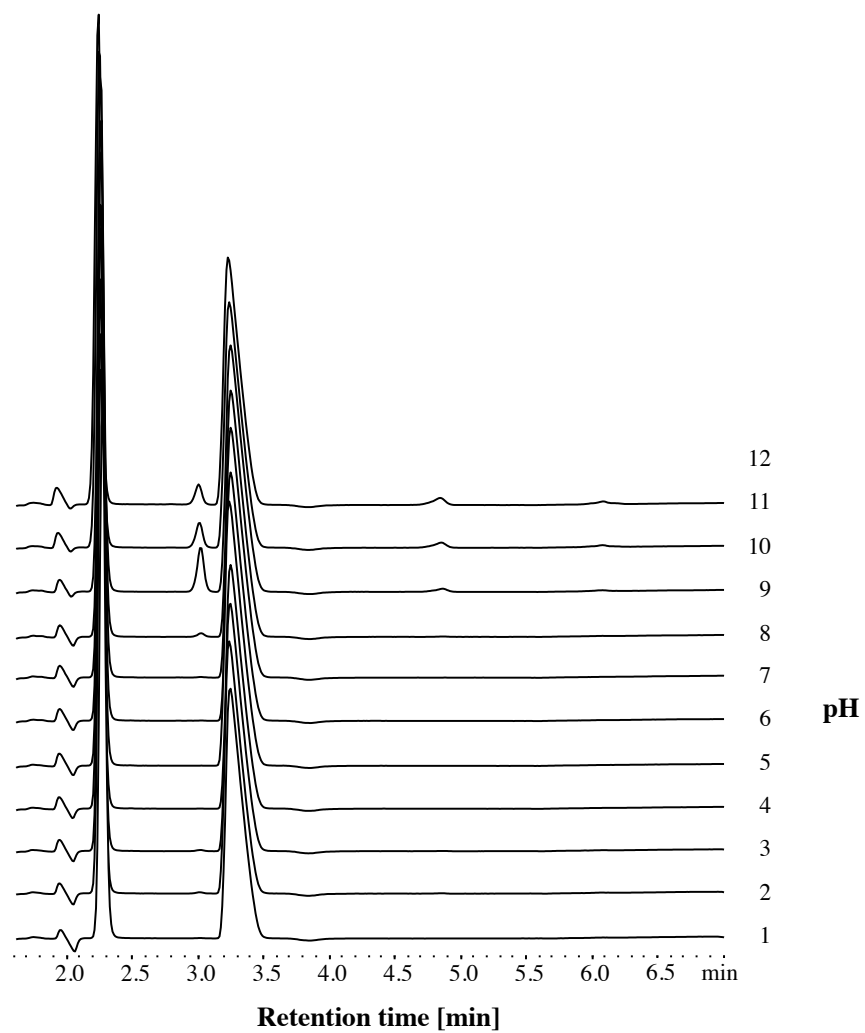

**Fig. S4.** Ion pairing HPLC chromatograms of an alanine and glycine condensation reaction in the absence of TP at 60°C as a function of pH.

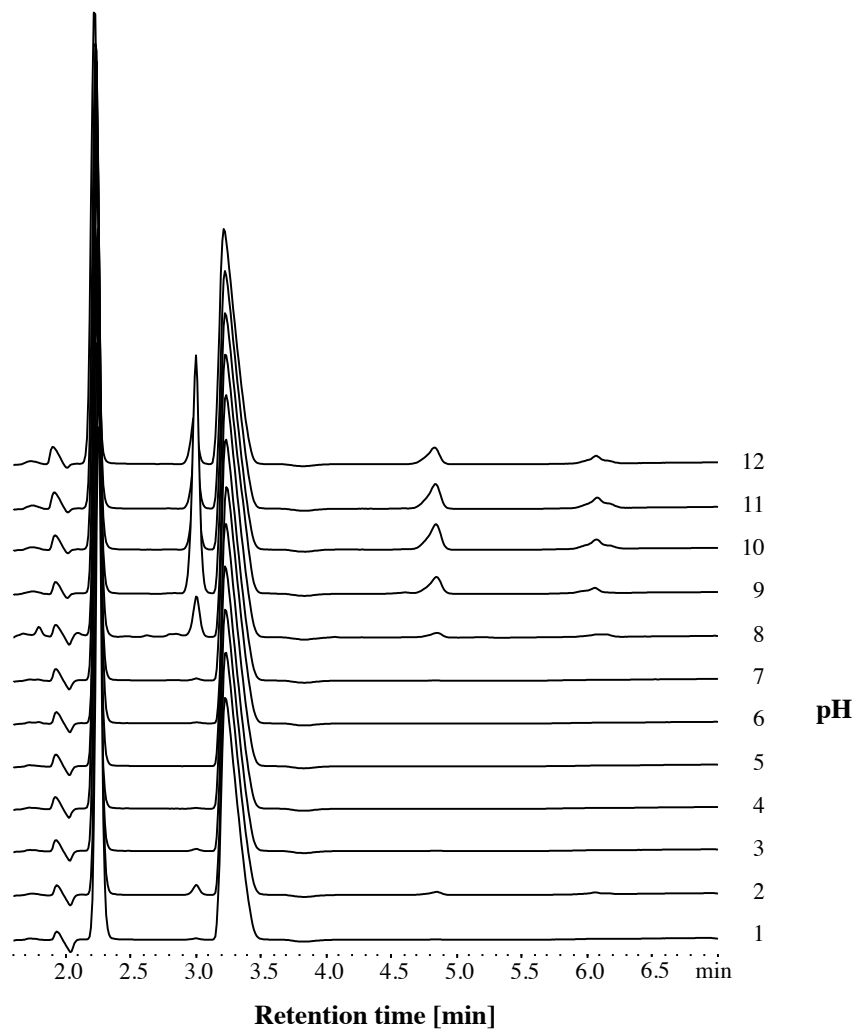

**Fig. S5.** Ion pairing HPLC chromatograms of an alanine and glycine condensation reaction in the absence of TP at 70°C as a function of pH.

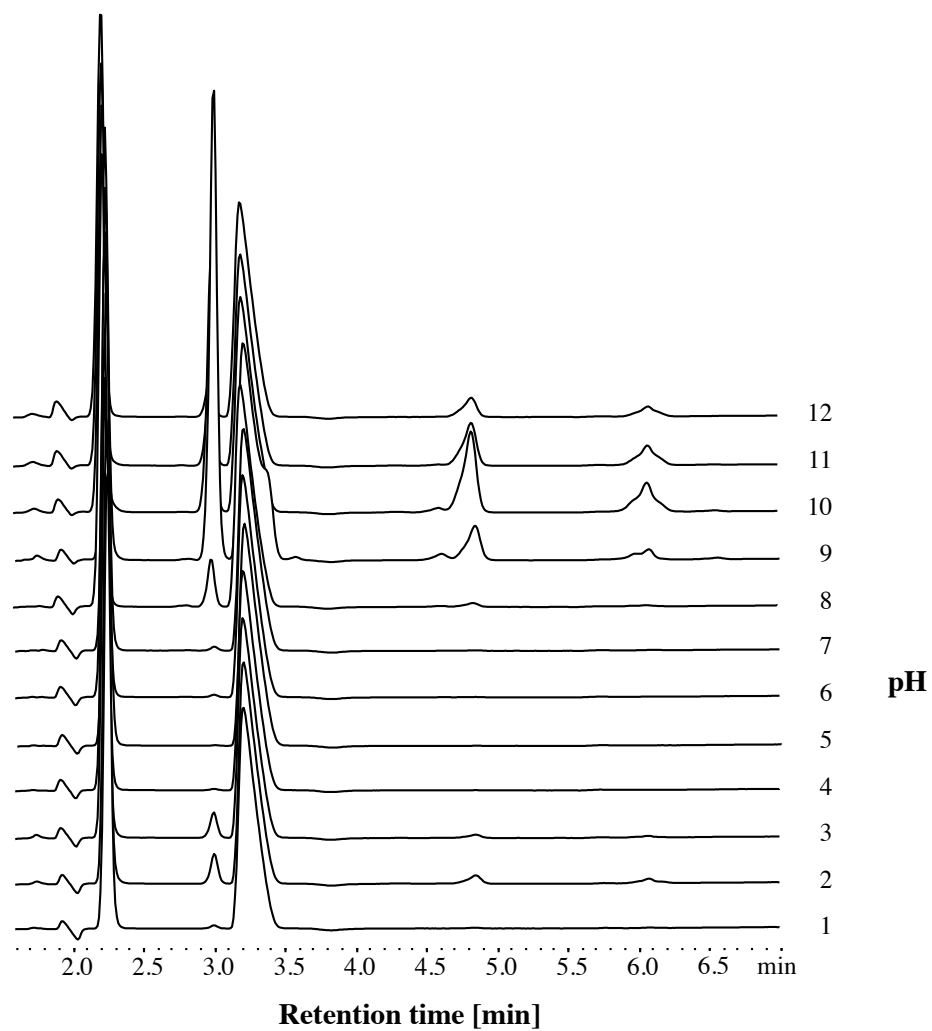

**Fig. S6.** Ion pairing HPLC chromatograms of an alanine and glycine condensation reaction in the absence of TP at 80°C as a function of pH.

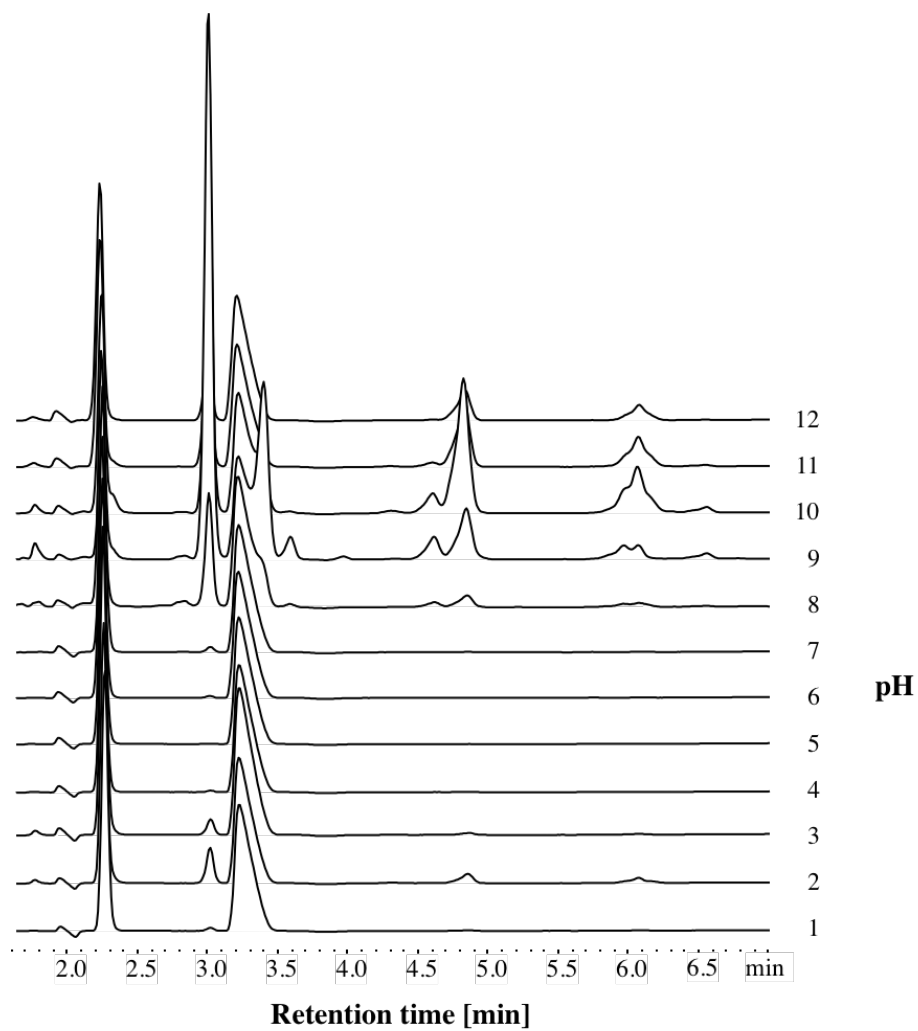

**Fig. S7.** Ion pairing HPLC chromatograms of an alanine and glycine condensation reaction in the absence of TP at 90°C as a function of pH.



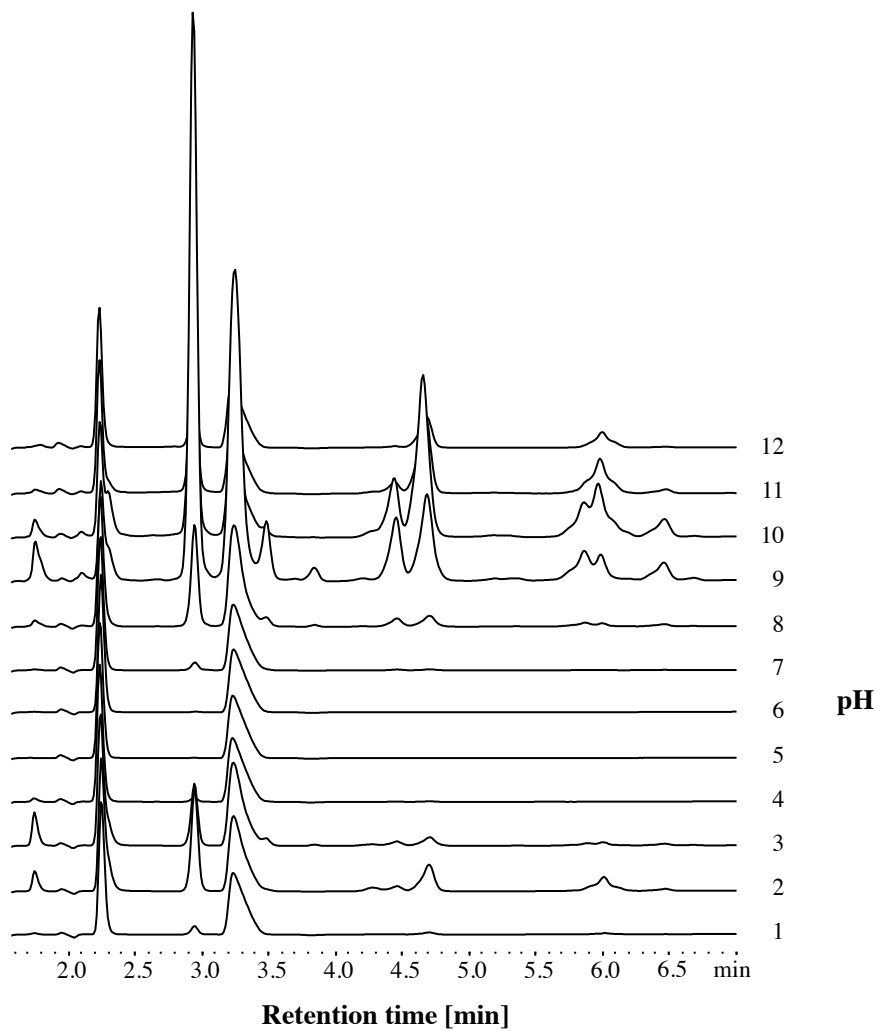

**Fig. S8.** Ion pairing HPLC chromatograms of an alanine and glycine condensation reaction in the absence of TP at 100°C as a function of pH.

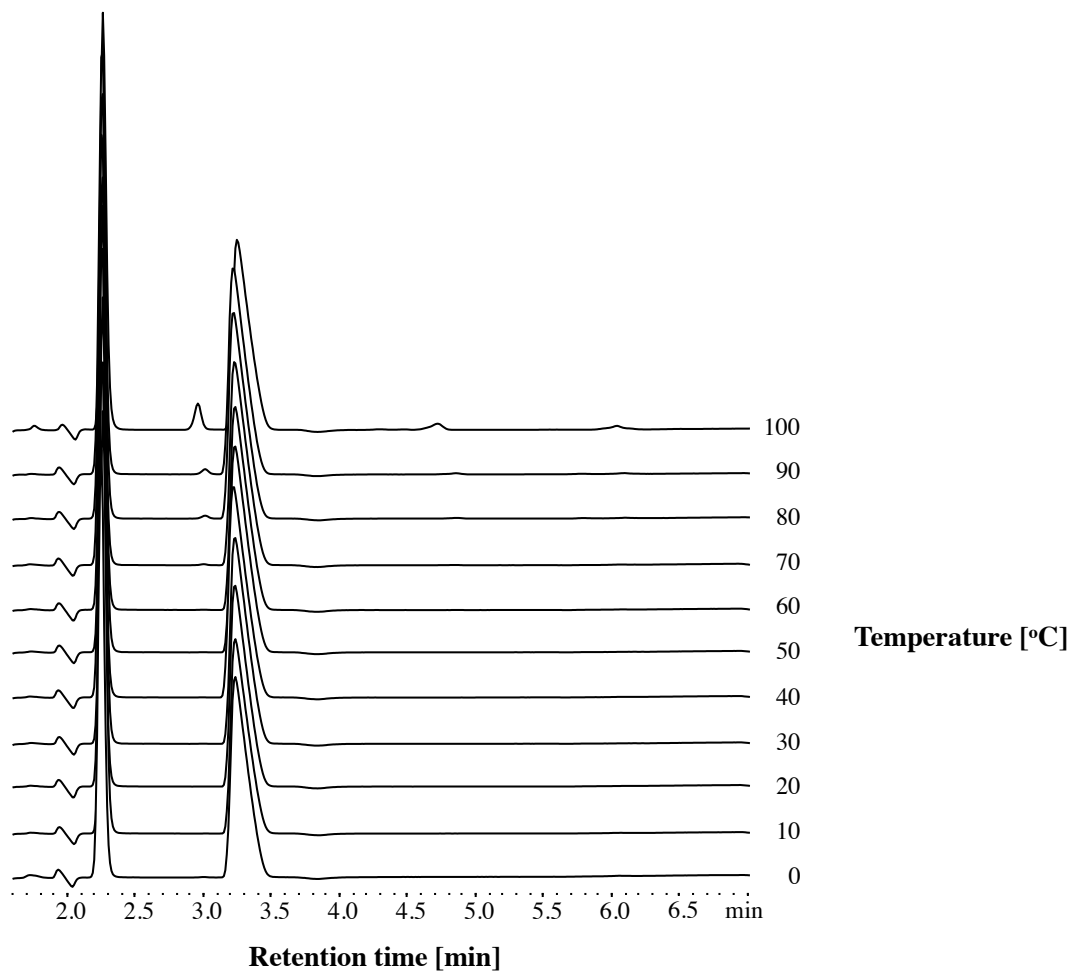

**Fig. S9.** Ion pairing HPLC chromatograms of an alanine and glycine condensation reaction in the absence of TP at pH 1 as a function of temperature.

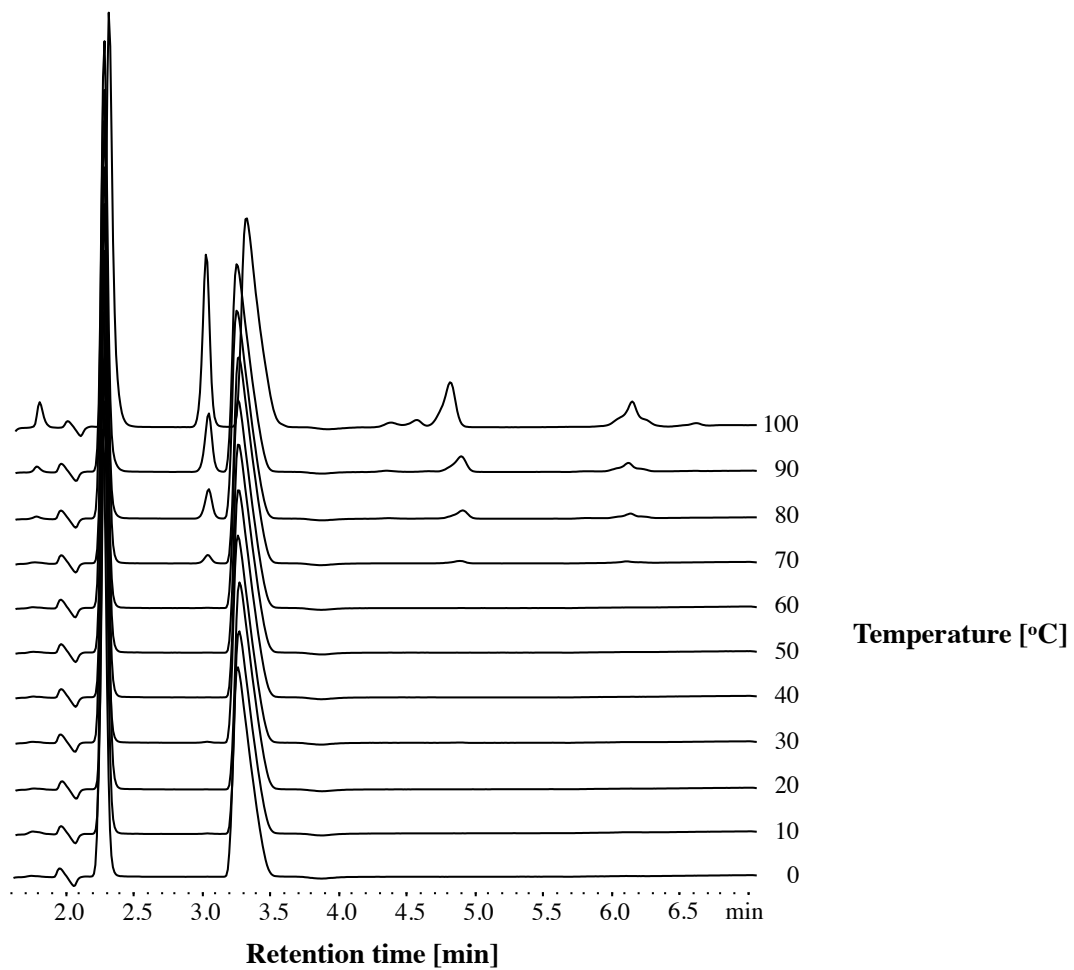

**Fig. S10.** Ion pairing HPLC chromatograms of an alanine and glycine condensation reaction in the absence of TP at pH 2 as a function of temperature.

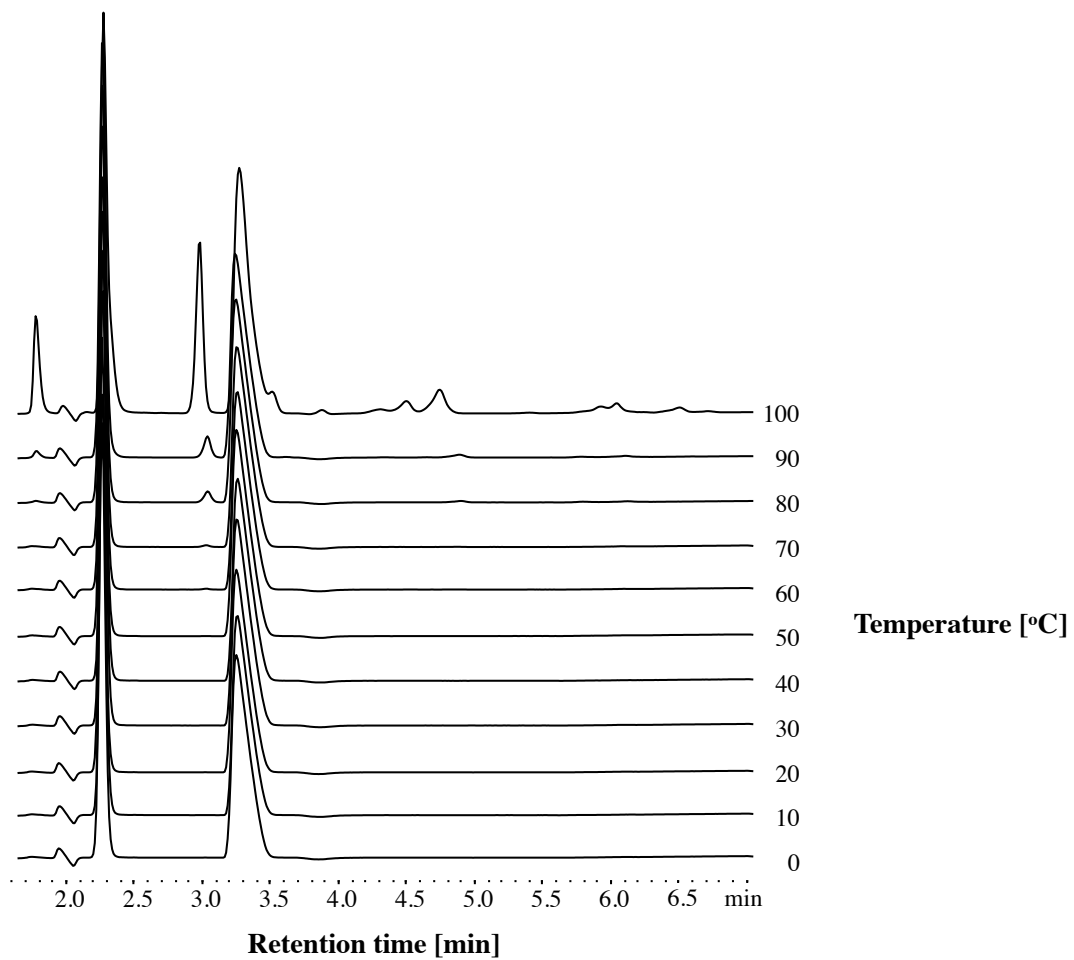

**Fig. S11.** Ion pairing HPLC chromatograms of an alanine and glycine condensation reaction in the absence of TP at pH 3 as a function of temperature.

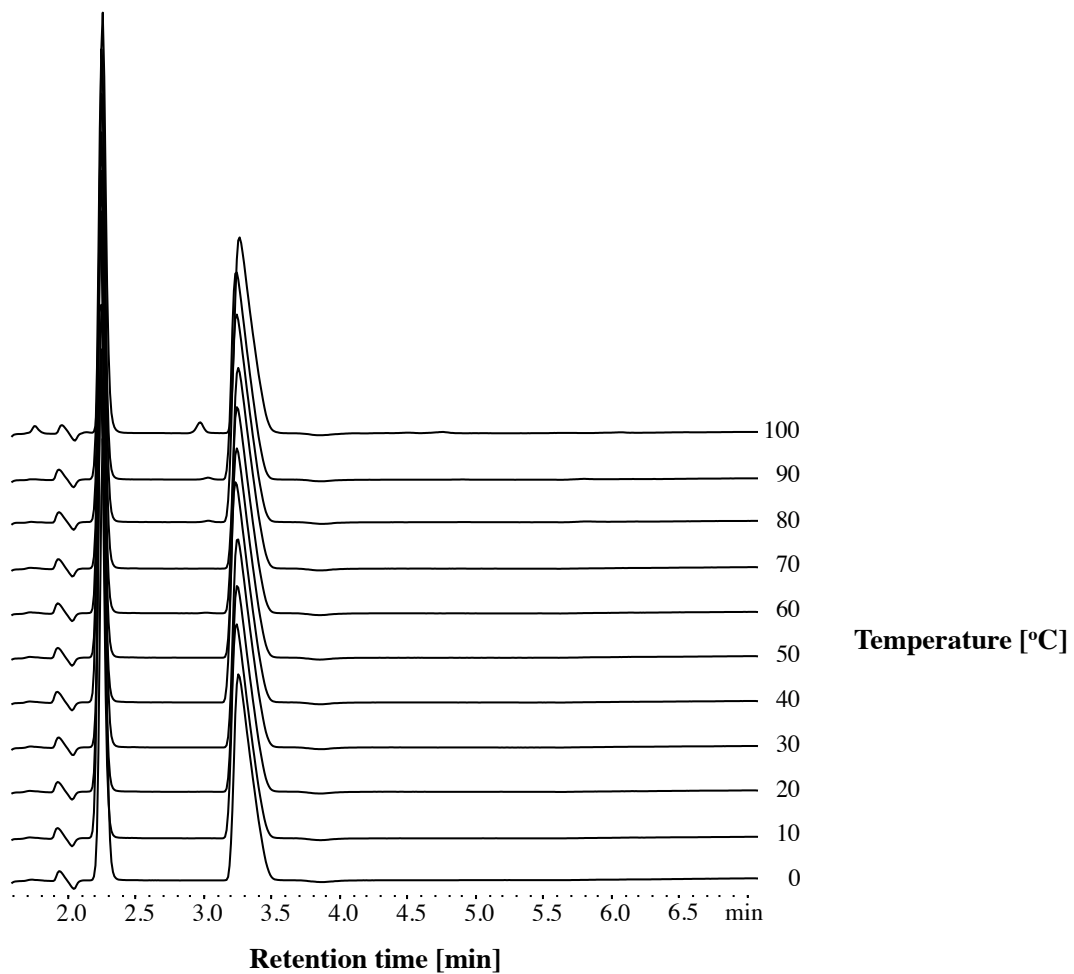

**Fig. S12.** Ion pairing HPLC chromatograms of an alanine and glycine condensation reaction in the absence of TP at pH 4 as a function of temperature.

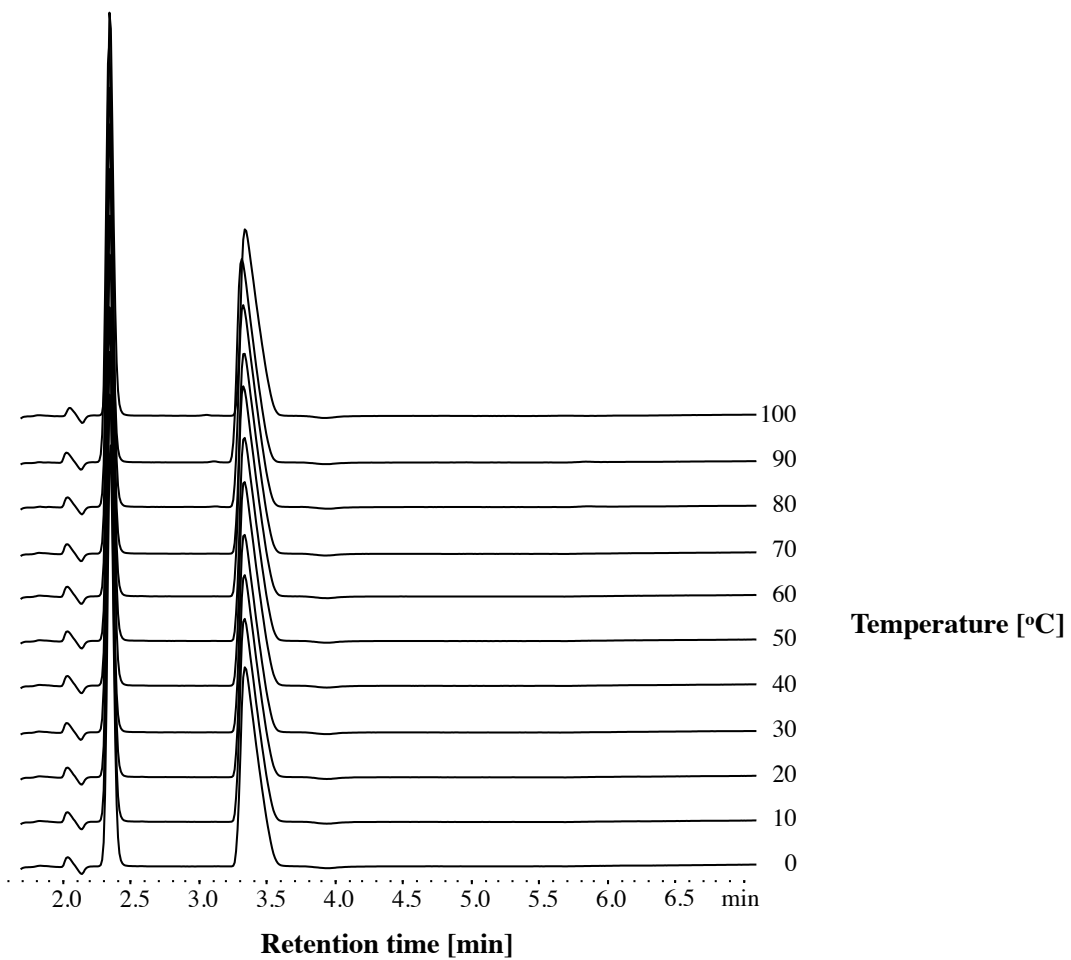

**Fig. S13.** Ion pairing HPLC chromatograms of an alanine and glycine condensation reaction in the absence of TP at pH 5 as a function of temperature.

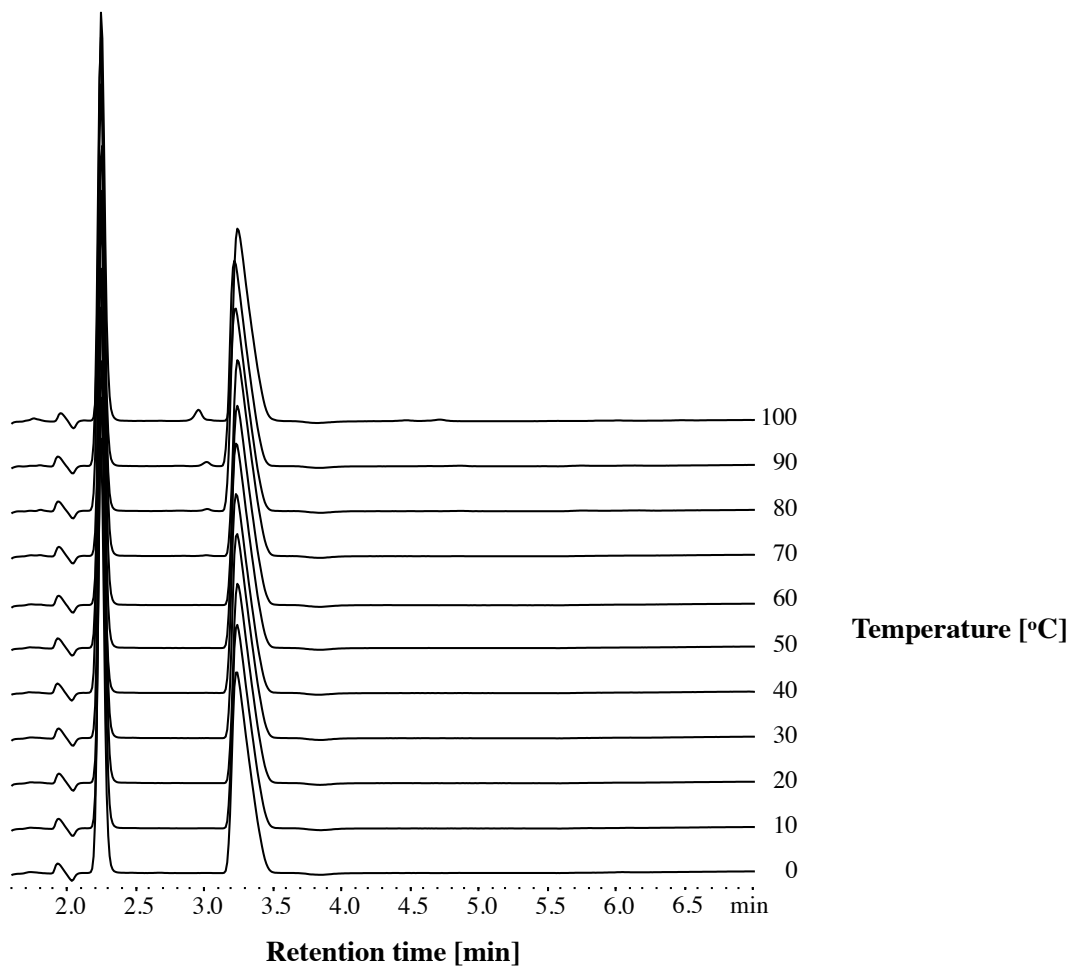

**Fig. S14.** Ion pairing HPLC chromatograms of an alanine and glycine condensation reaction in the absence of TP at pH 6 as a function of temperature.

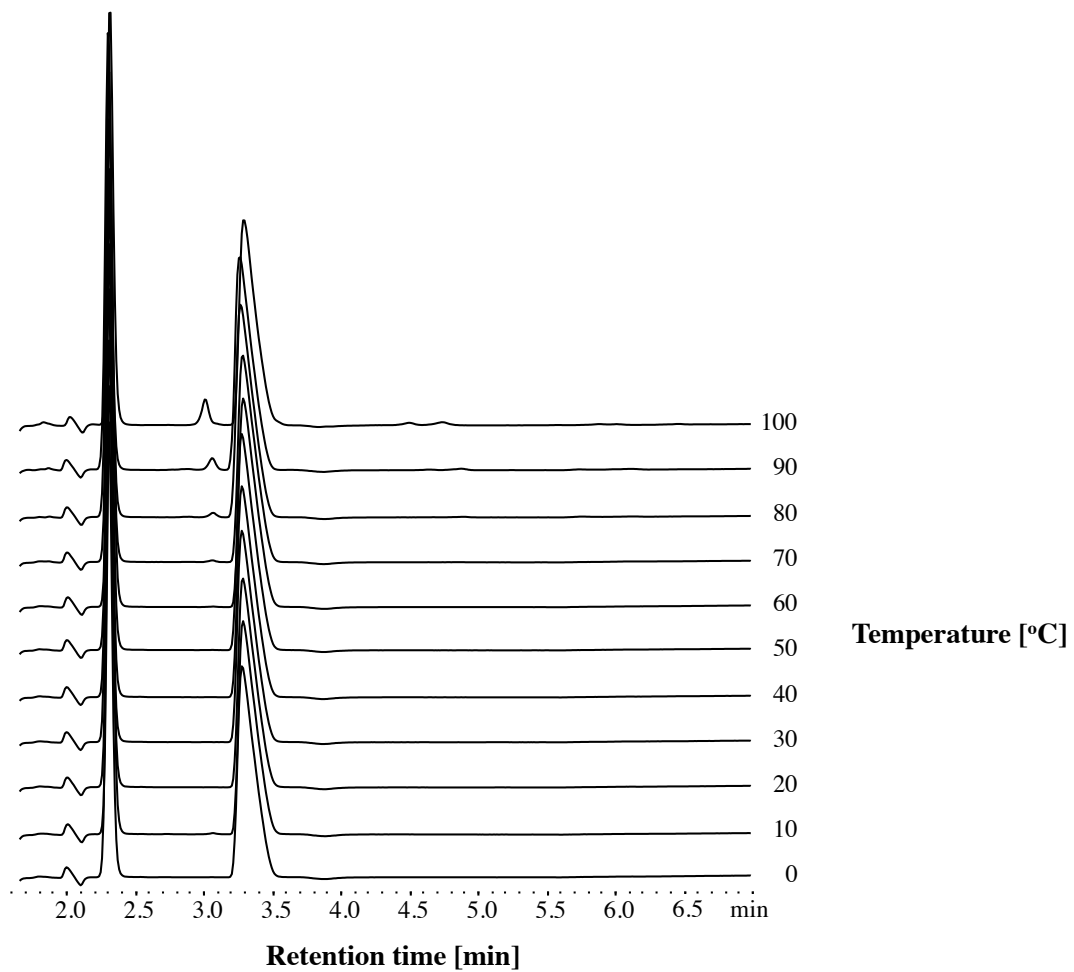

**Fig. S15.** Ion pairing HPLC chromatograms of an alanine and glycine condensation reaction in the absence of TP at pH 7 as a function of temperature.



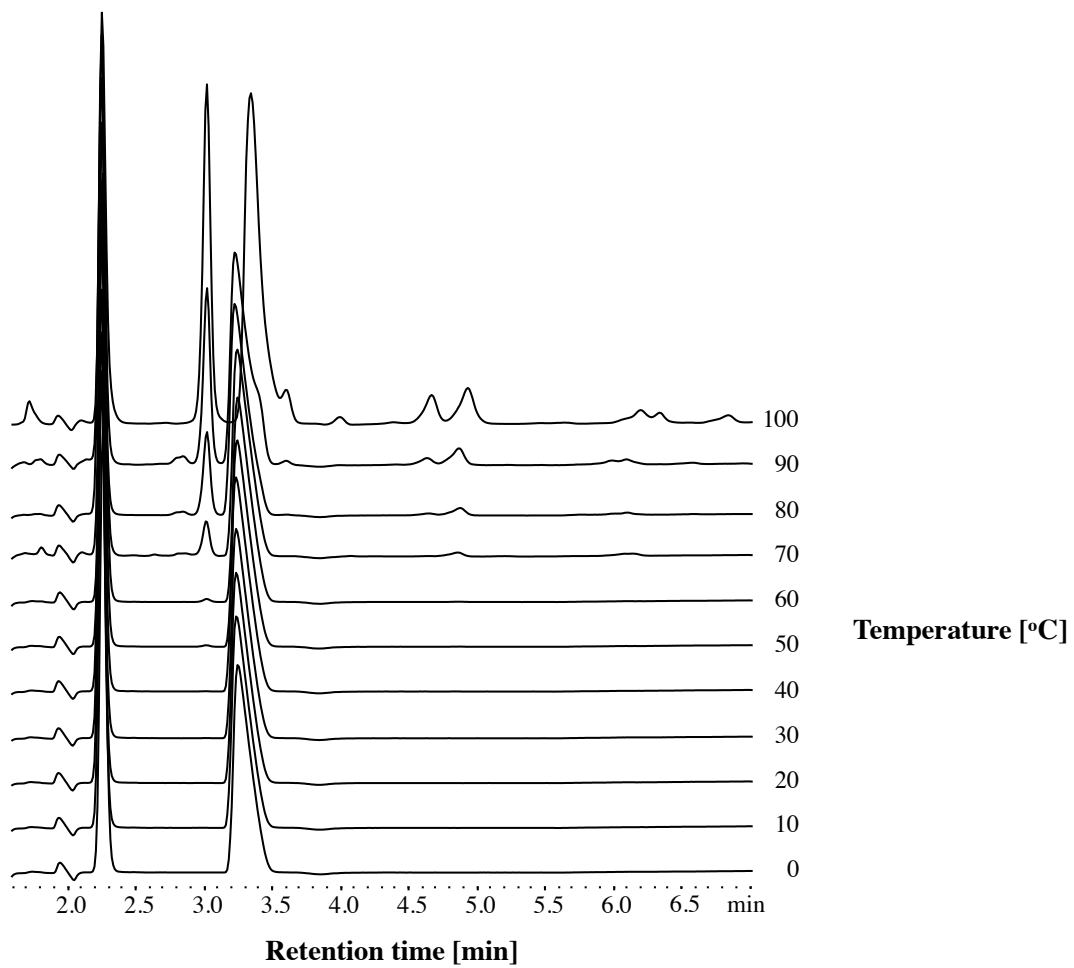

**Fig. S16.** Ion pairing HPLC chromatograms of an alanine and glycine condensation reaction in the absence of TP at pH 8 as a function of temperature.

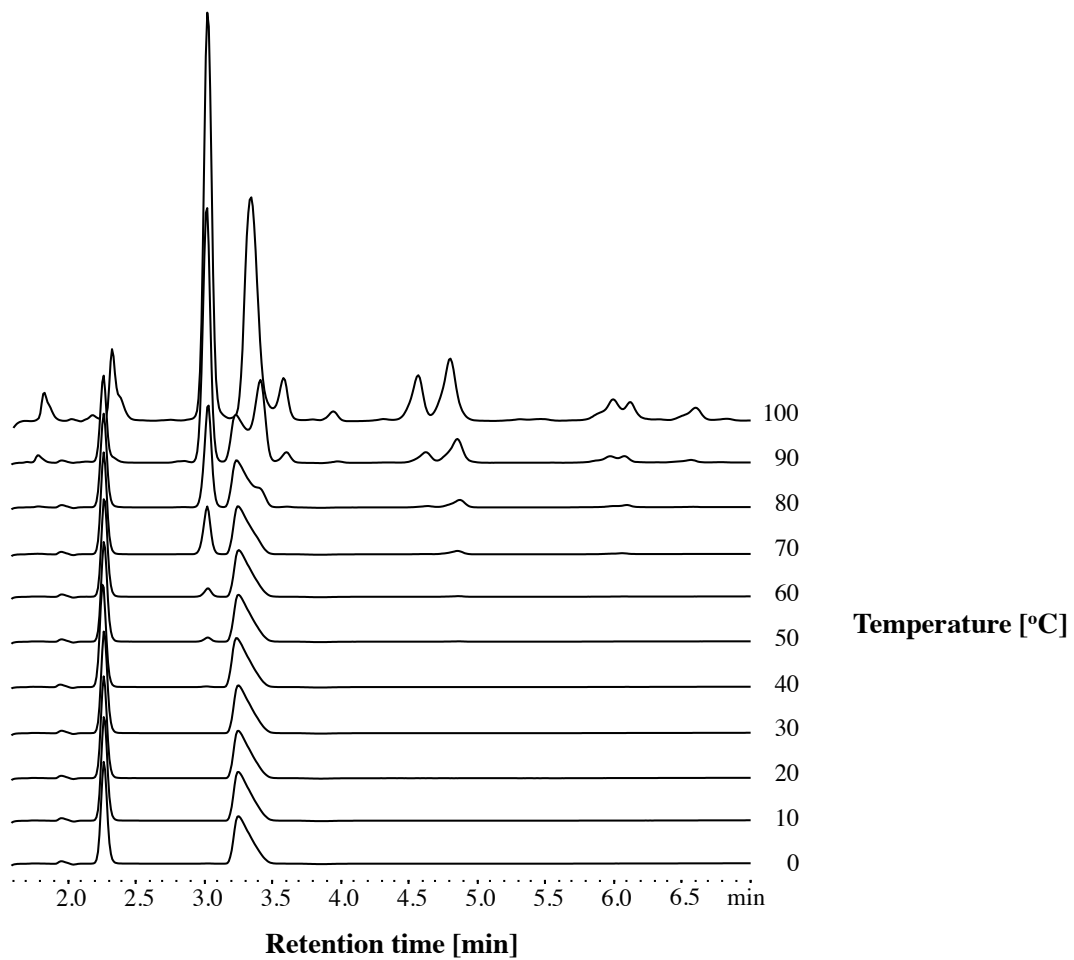

**Fig. S17.** Ion pairing HPLC chromatograms of an alanine and glycine condensation reaction in the absence of TP at pH 9 as a function of temperature.

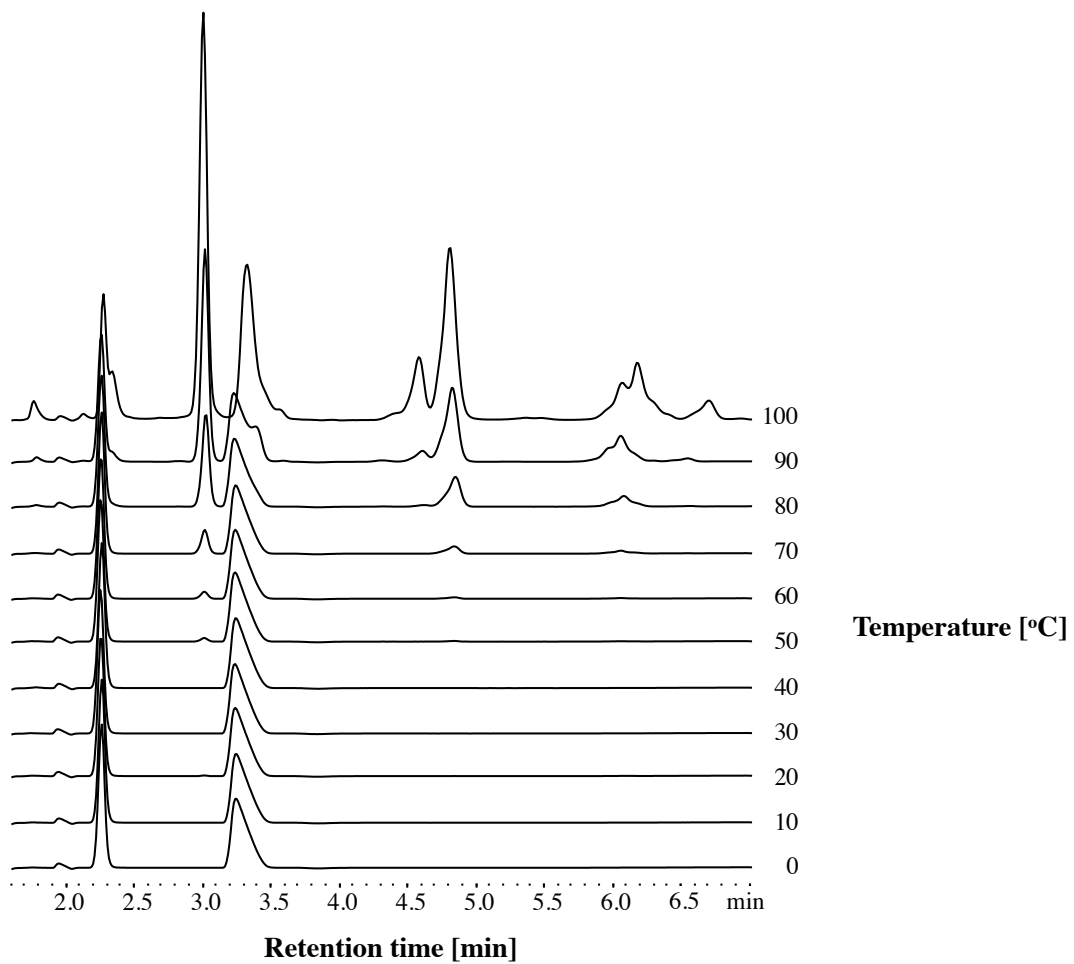

**Fig. S18.** Ion pairing HPLC chromatograms of an alanine and glycine condensation reaction in the absence of TP at pH 10 as a function of temperature.

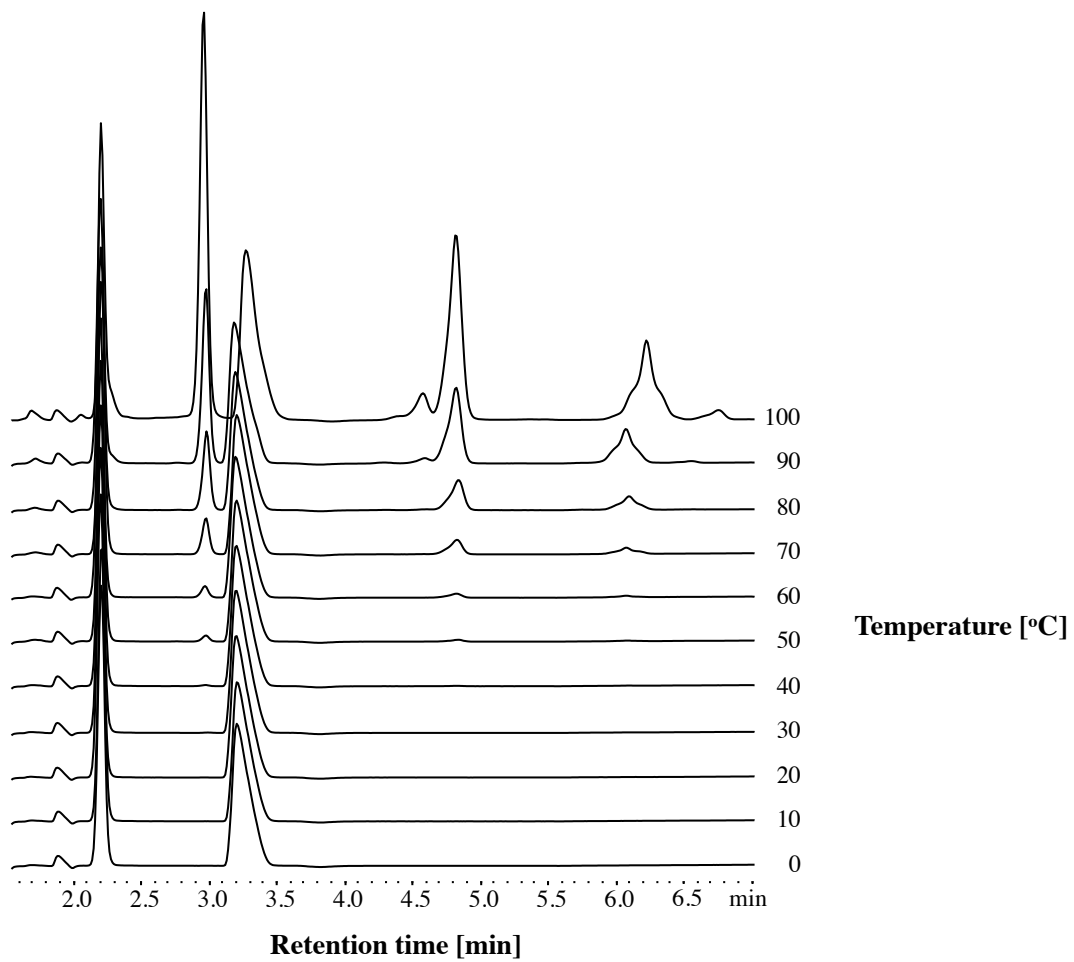

**Fig. S19.** Ion pairing HPLC chromatograms of an alanine and glycine condensation reaction in the absence of TP at pH 11 as a function of temperature.

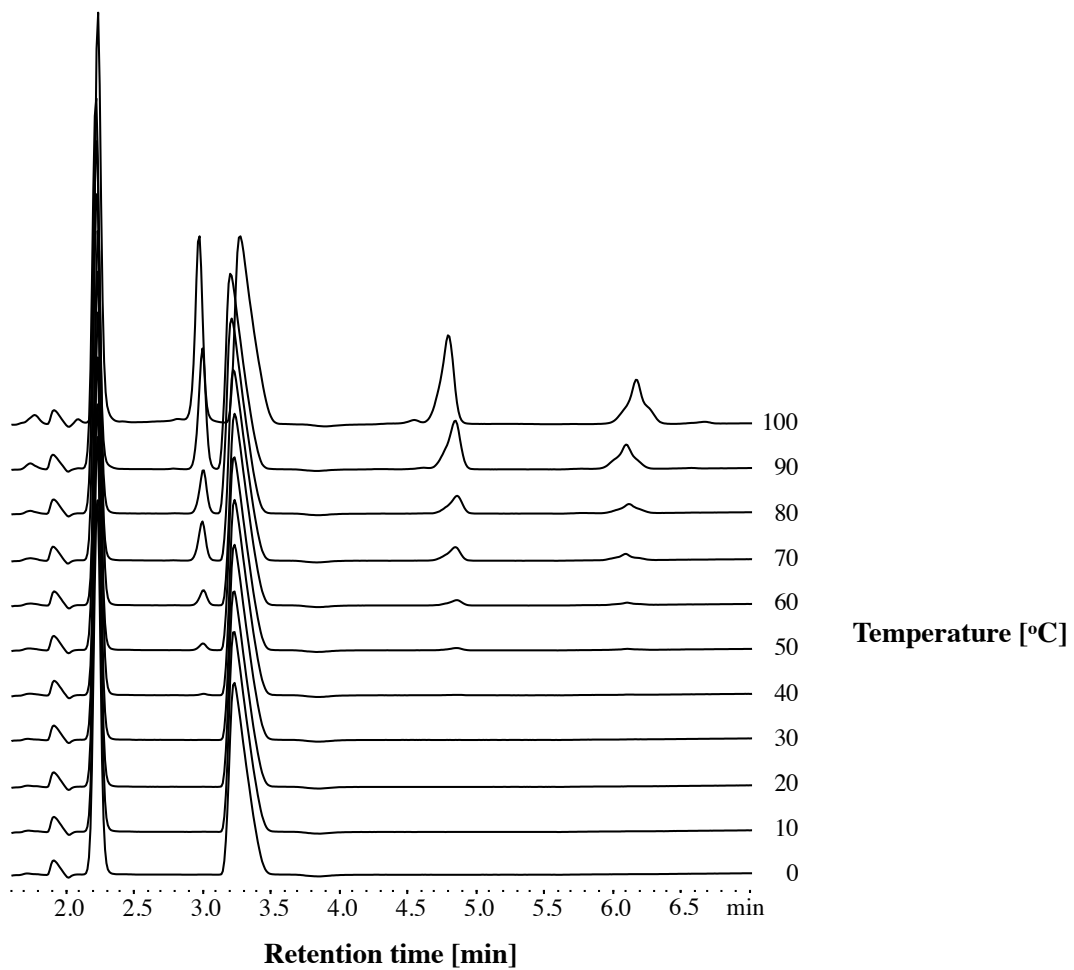

**Fig. S20.** Ion pairing HPLC chromatograms of an alanine and glycine condensation reaction in the absence of TP at pH 12 as a function of temperature.

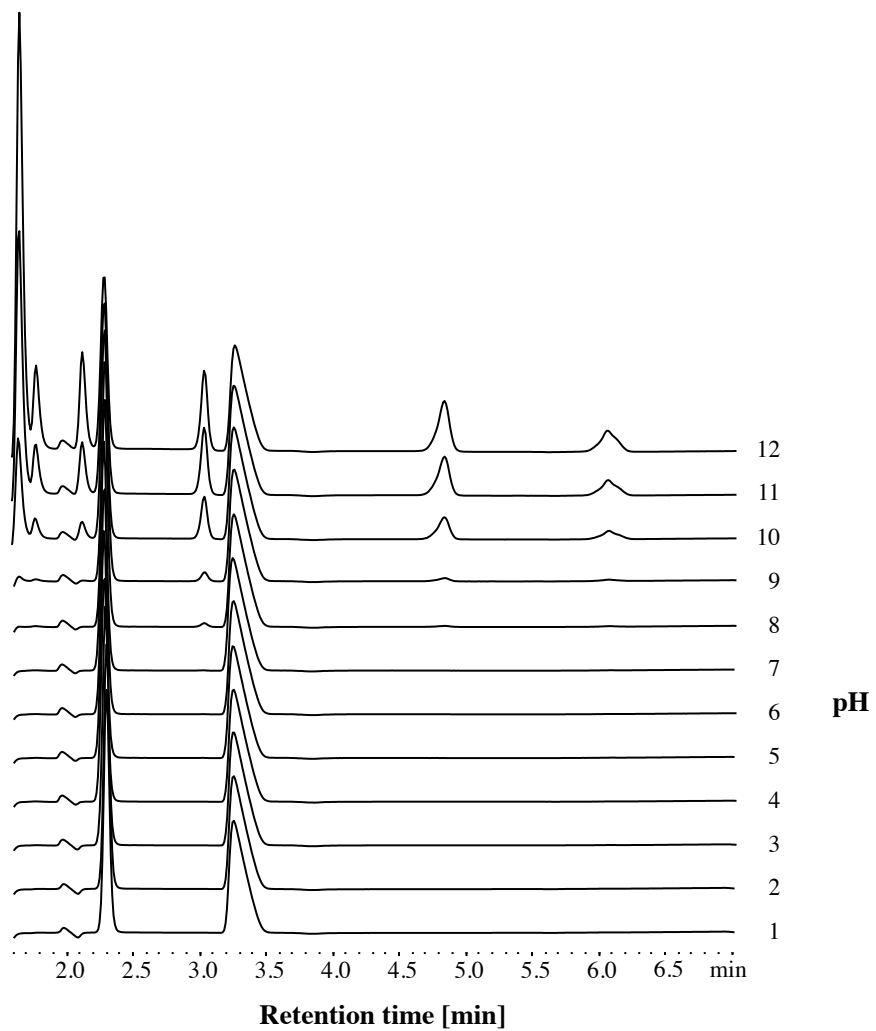

**Fig. S21.** Ion pairing HPLC chromatograms of an alanine and glycine condensation reaction in the presence of TP at 0°C as a function of pH.

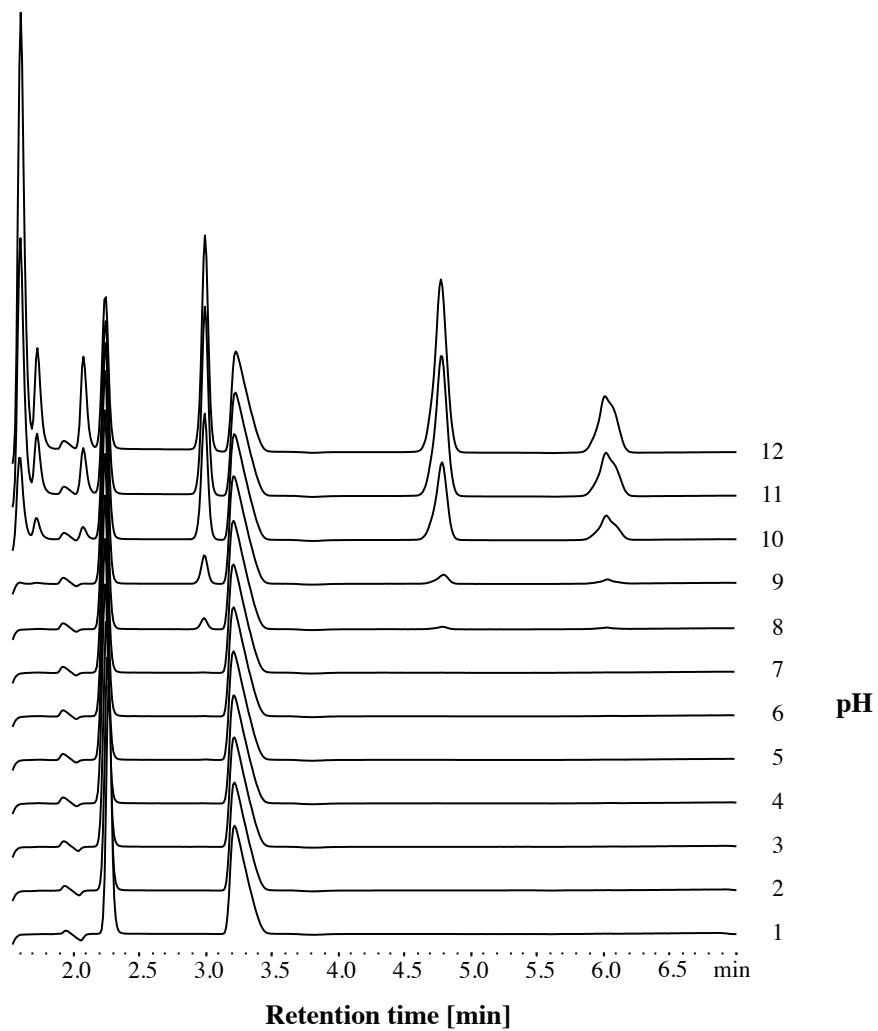

**Fig. S22.** Ion pairing HPLC chromatograms of an alanine and glycine condensation reaction in the presence of TP at 10°C as a function of pH.

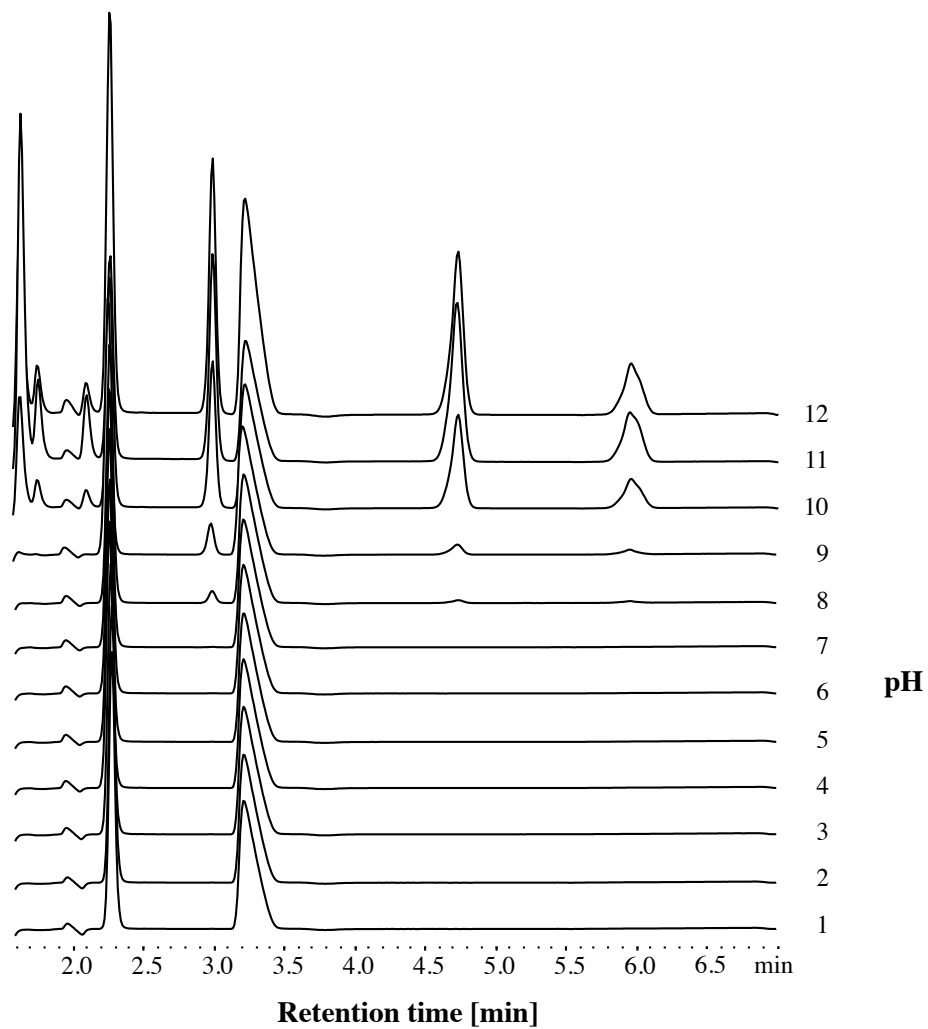

**Fig. S23.** Ion pairing HPLC chromatograms of an alanine and glycine condensation reaction in the presence of TP at 20°C as a function of pH.



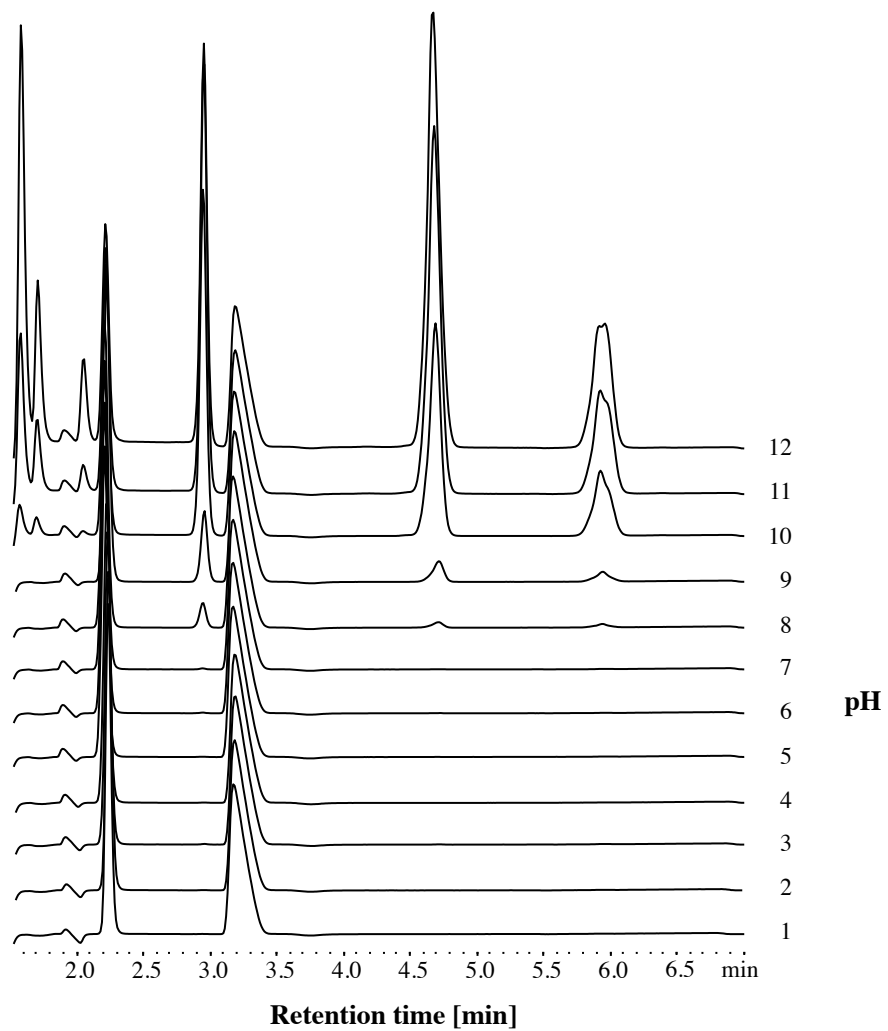

**Fig. S24.** Ion pairing HPLC chromatograms of an alanine and glycine condensation reaction in the presence of TP at 30°C as a function of pH.

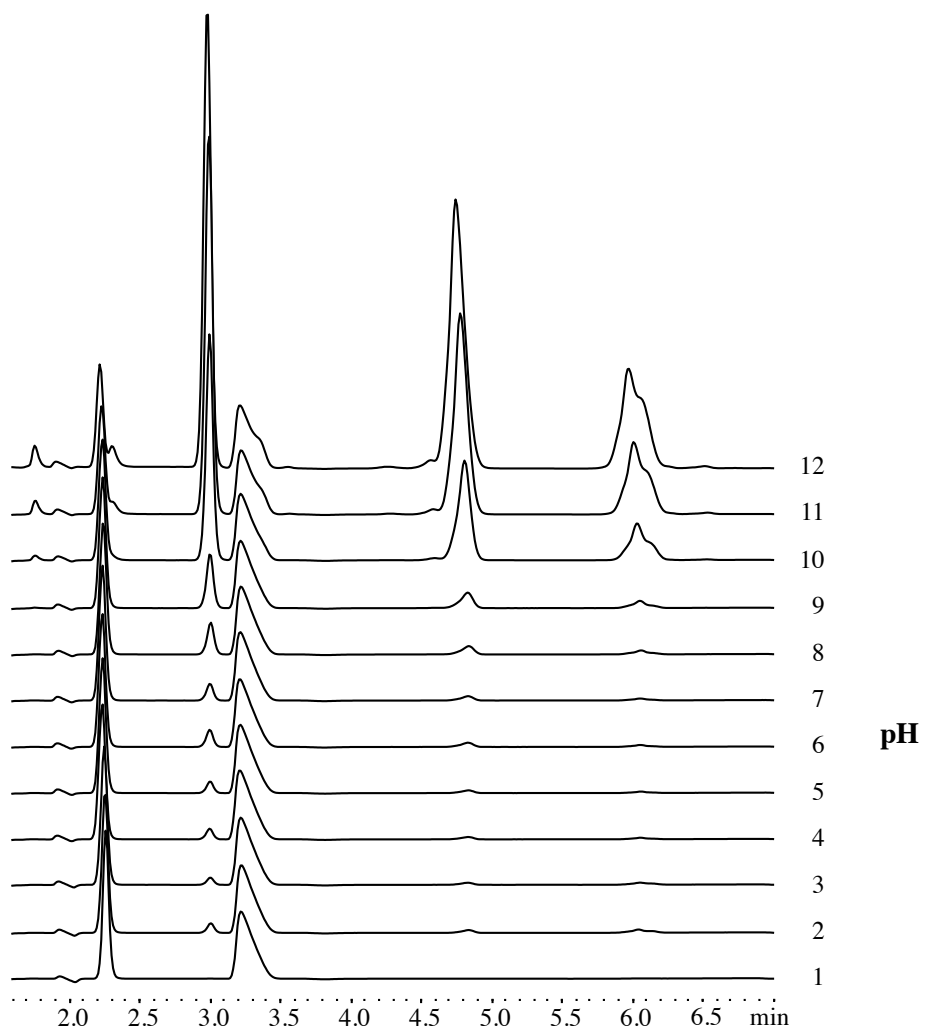

**Fig. S25.** Ion pairing HPLC chromatograms of an alanine and glycine condensation reaction in the presence of TP at 40°C as a function of pH.

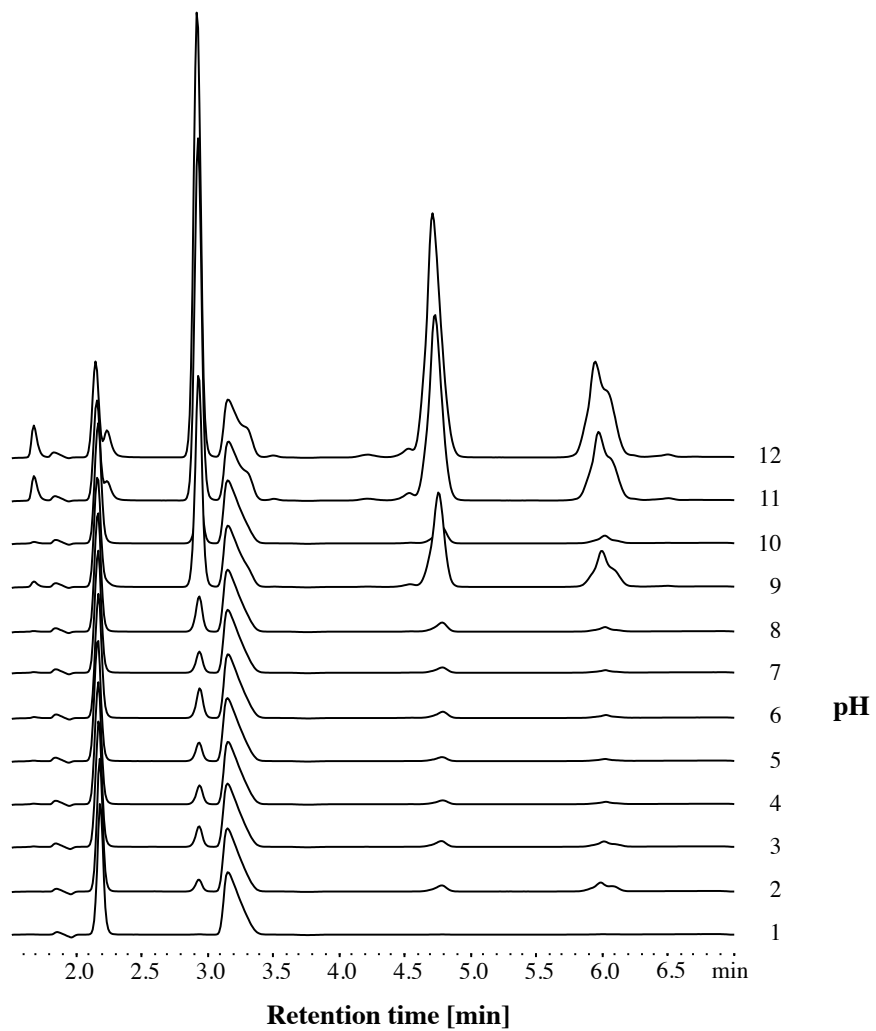

**Fig. S26.** Ion pairing HPLC chromatograms of an alanine and glycine condensation reaction in the presence of TP at 50°C as a function of pH.

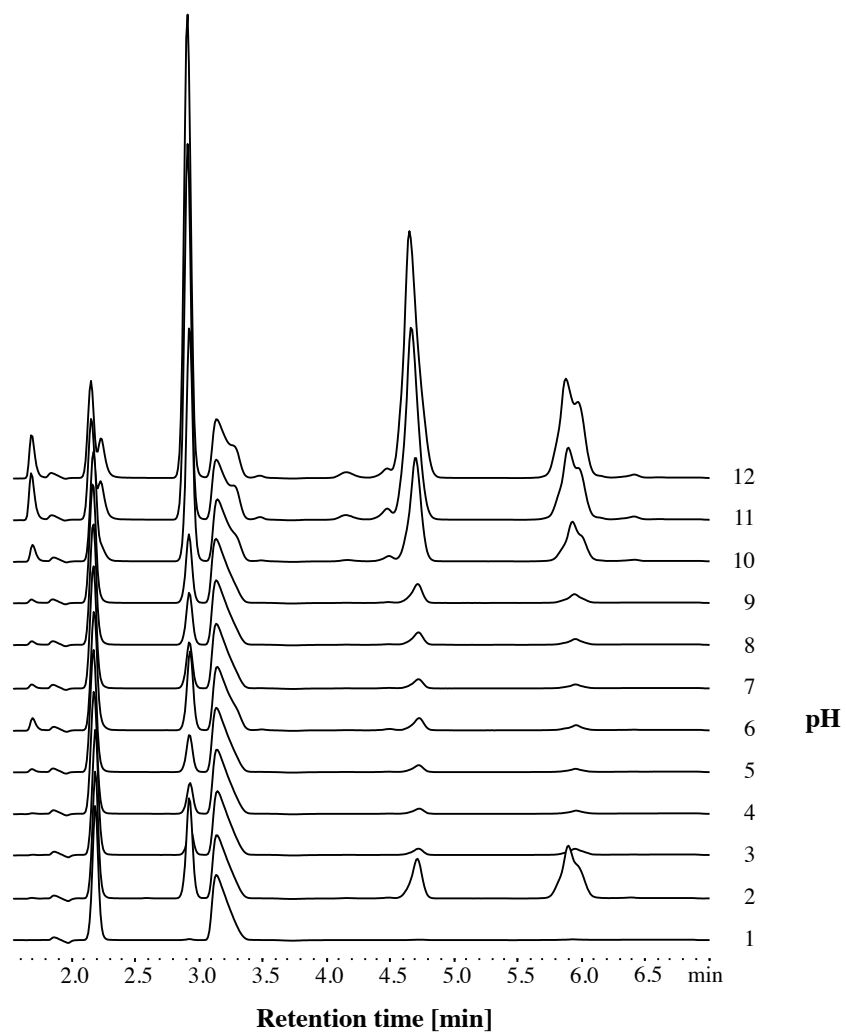

**Fig. S27.** Ion pairing HPLC chromatograms of an alanine and glycine condensation reaction in the presence of TP at 60°C as a function of pH.

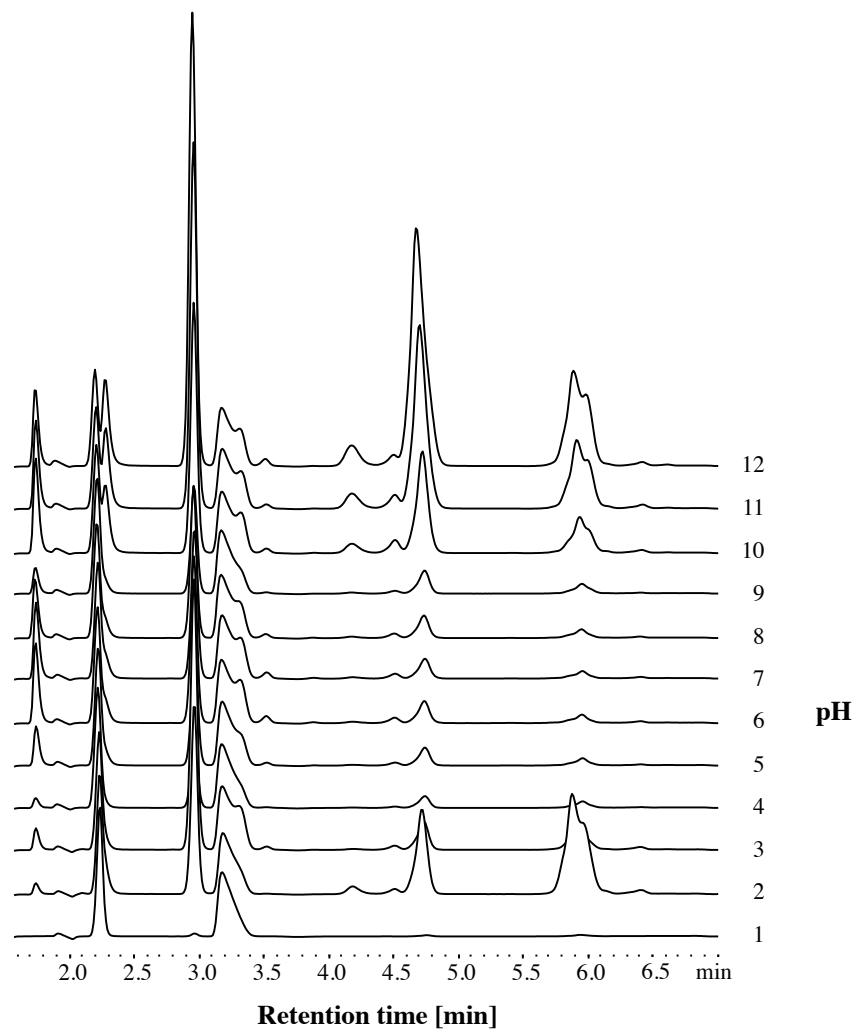

**Fig. S28.** Ion pairing HPLC chromatograms of an alanine and glycine condensation reaction in the presence of TP at 70°C as a function of pH.

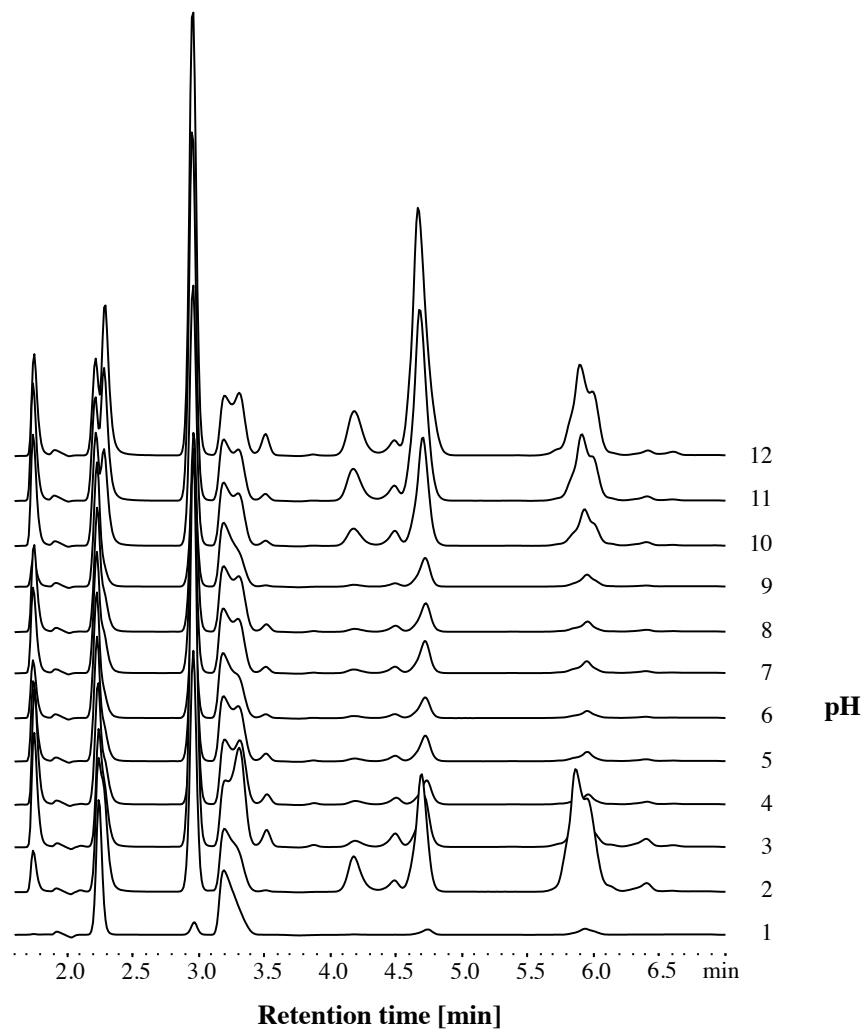

**Fig. S29.** Ion pairing HPLC chromatograms of an alanine and glycine condensation reaction in the presence of TP at 80°C as a function of pH.

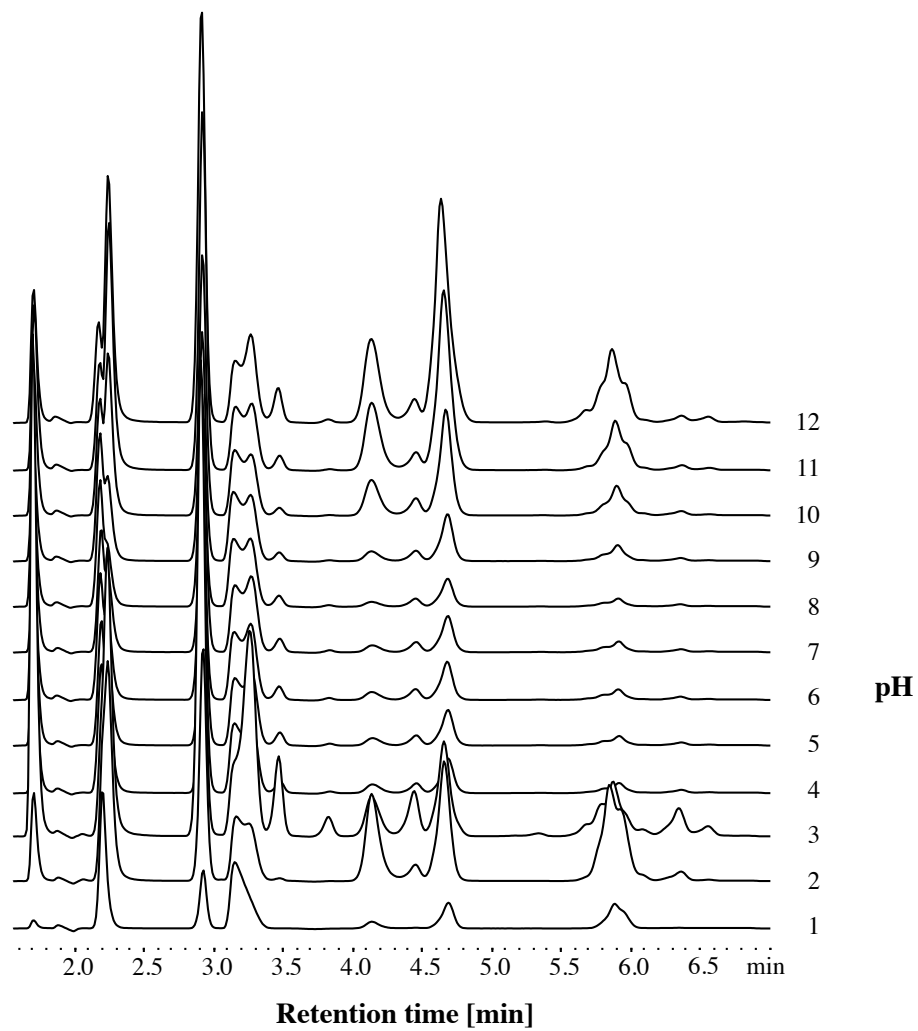

**Fig. S30.** Ion pairing HPLC chromatograms of an alanine and glycine condensation reaction in the presence of TP at 90°C as a function of pH.

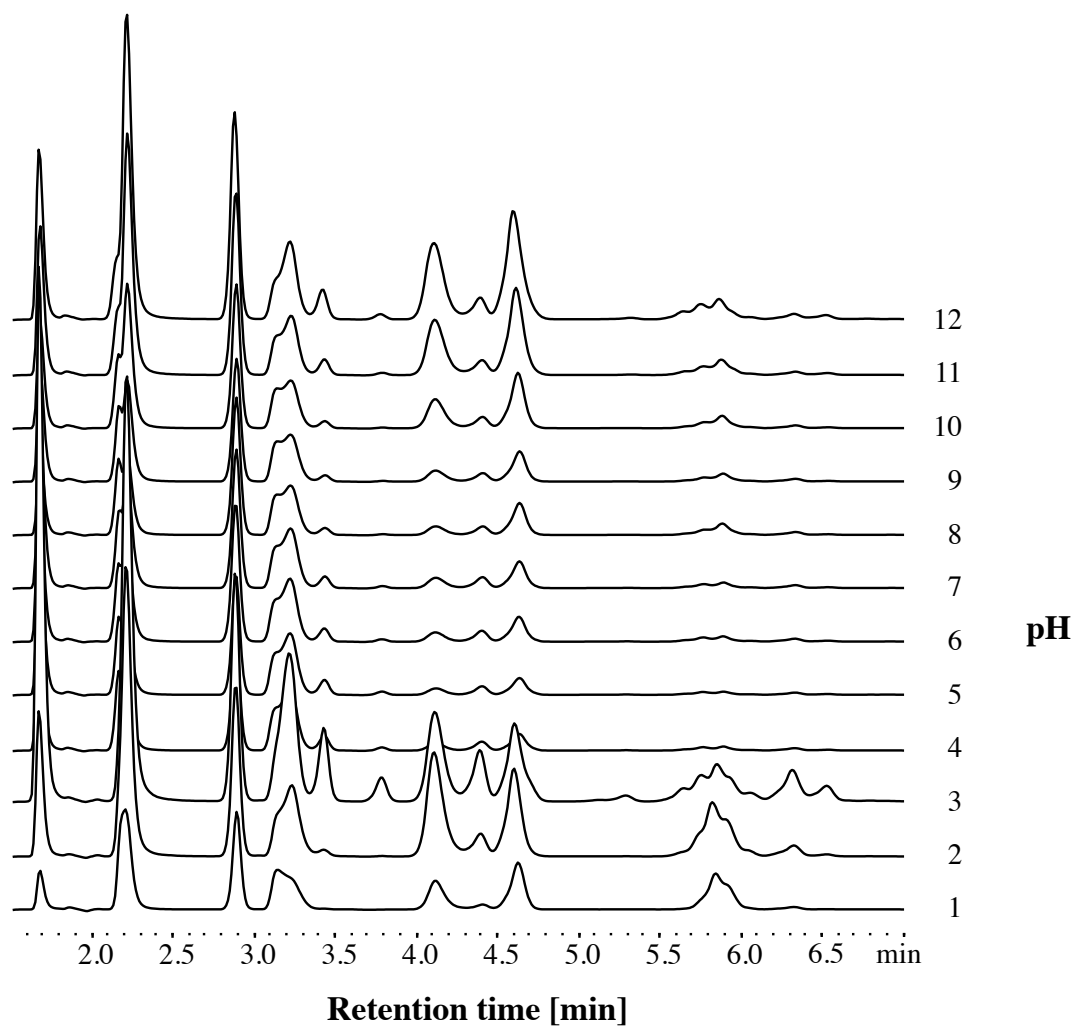

**Fig. S31.** Ion pairing HPLC chromatograms of an alanine and glycine condensation reaction in the presence of TP at 100°C as a function of pH.



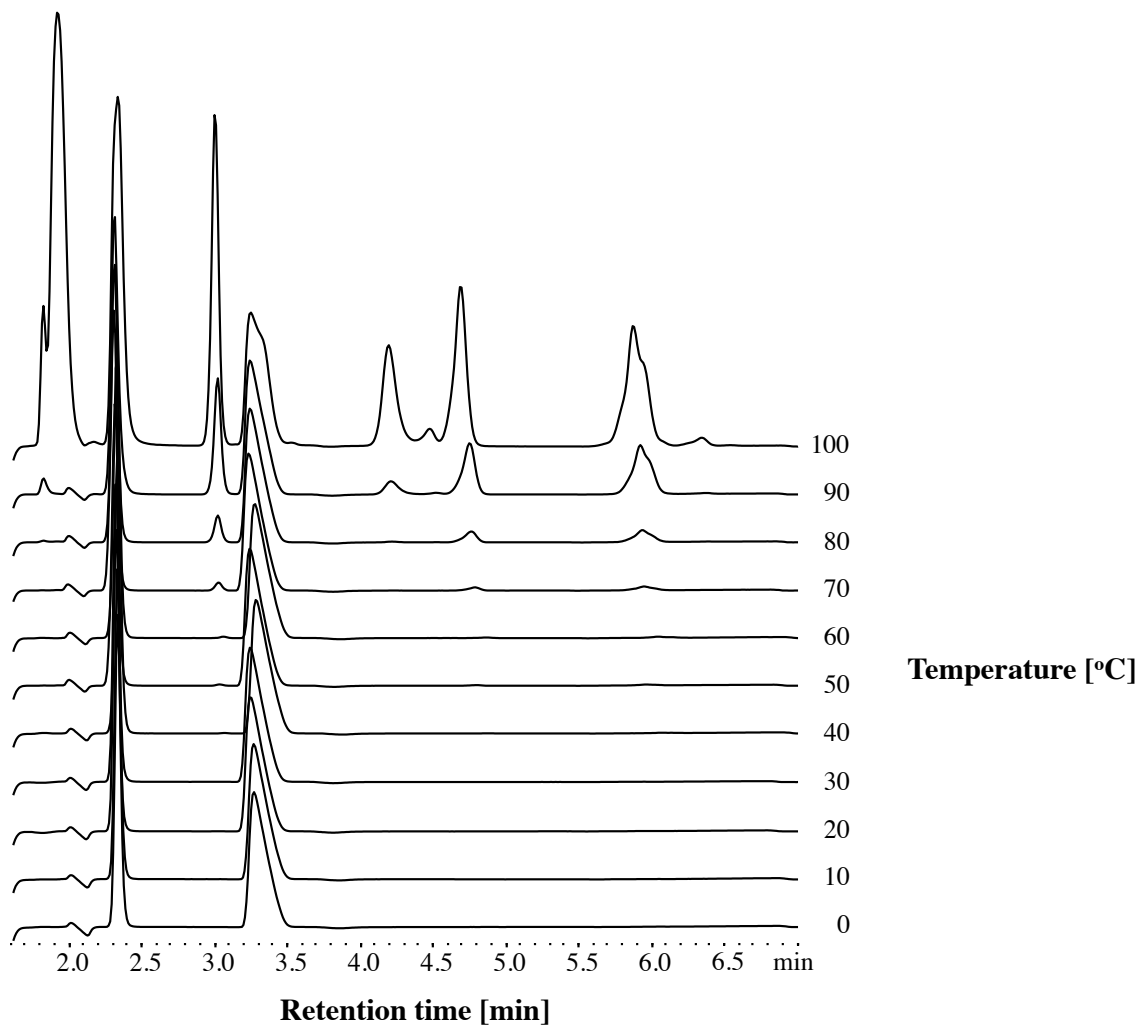

**Fig. S32.** Ion pairing HPLC chromatograms of an alanine and glycine condensation reaction in the presence of TP at pH 1 as a function of temperature.

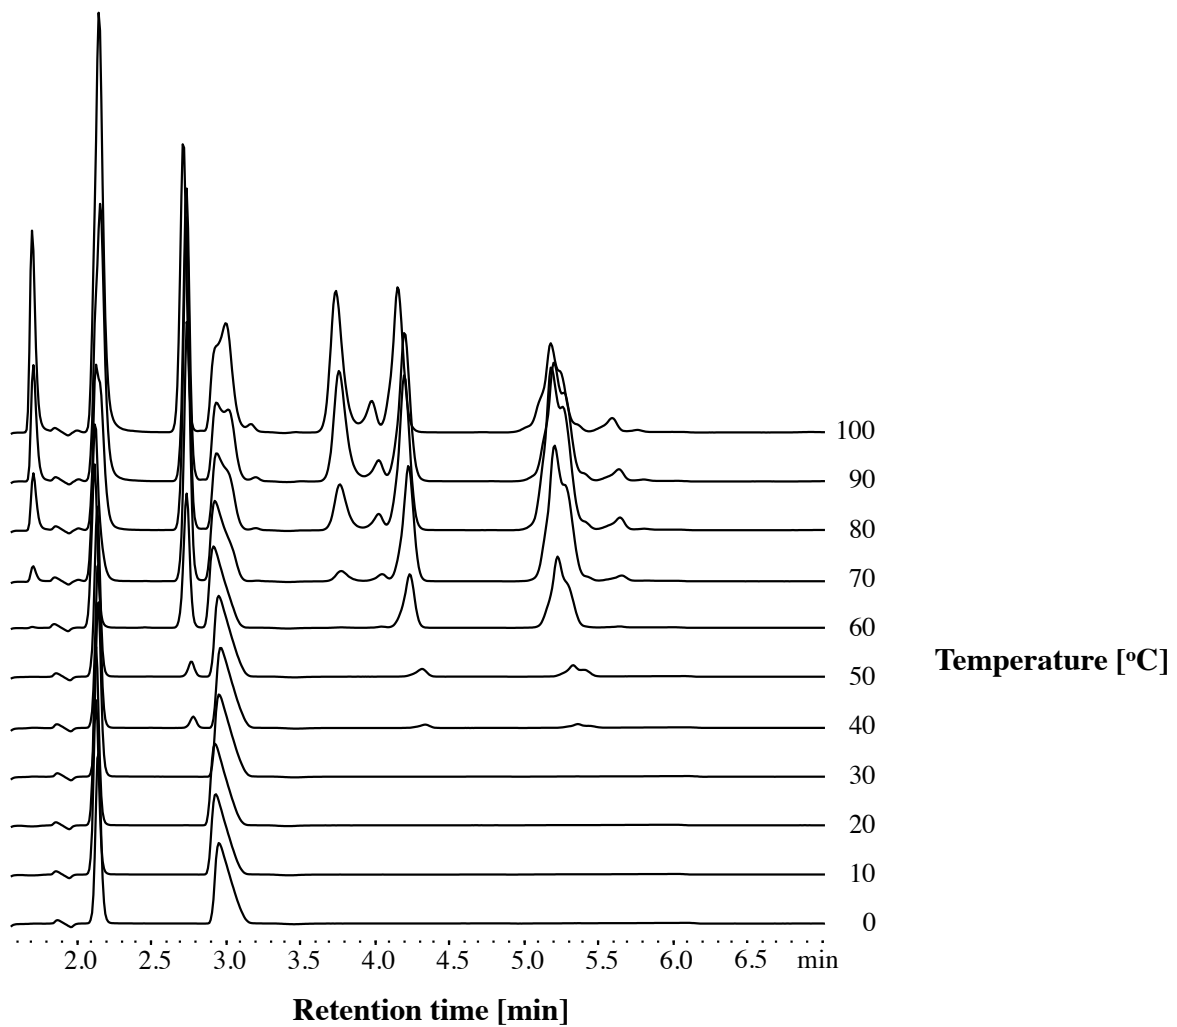

**Fig. S33.** Ion pairing HPLC chromatograms of an alanine and glycine condensation reaction in the presence of TP at pH 2 as a function of temperature.

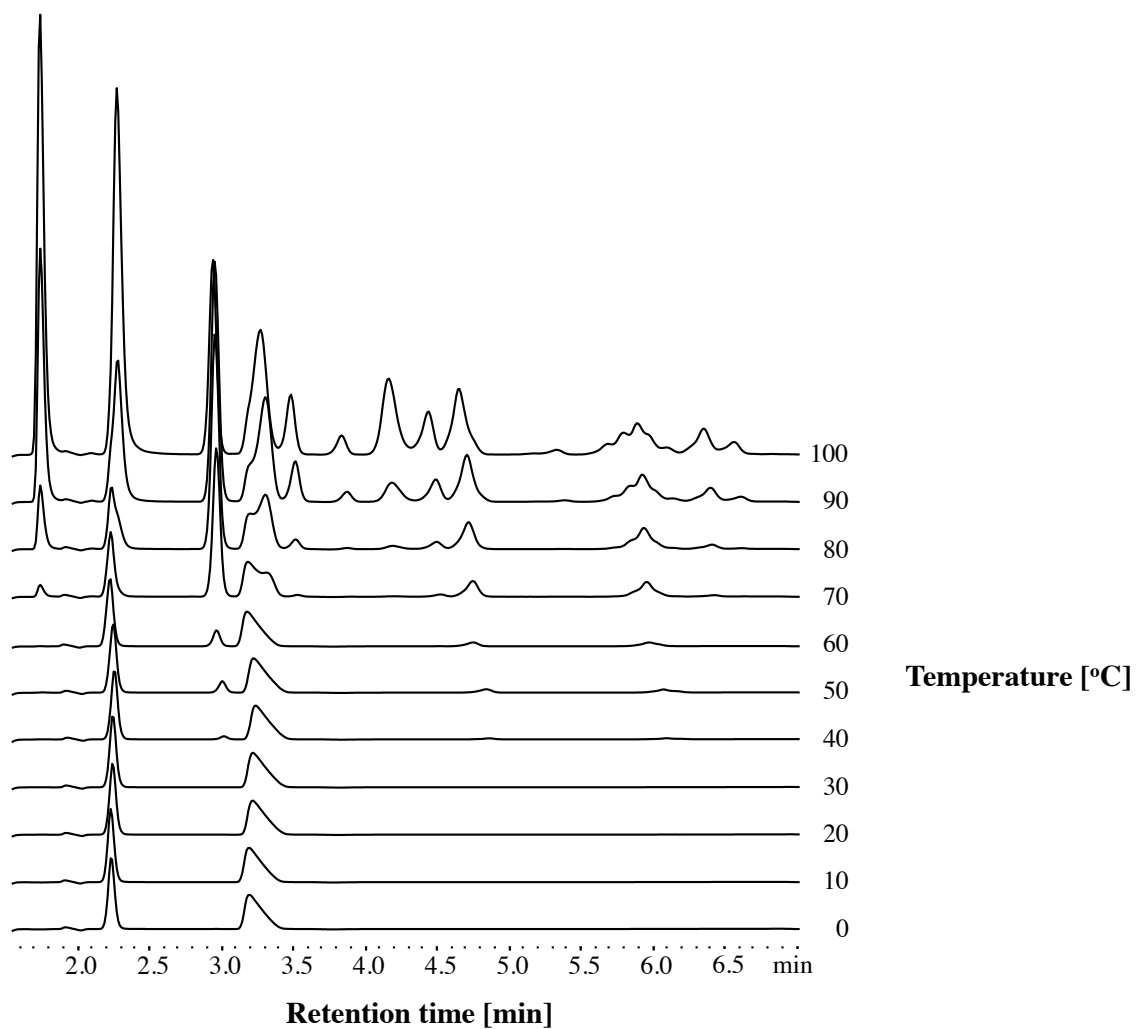

**Fig. S34.** Ion pairing HPLC chromatograms of an alanine and glycine condensation reaction in the presence of TP at pH 3 as a function of temperature.

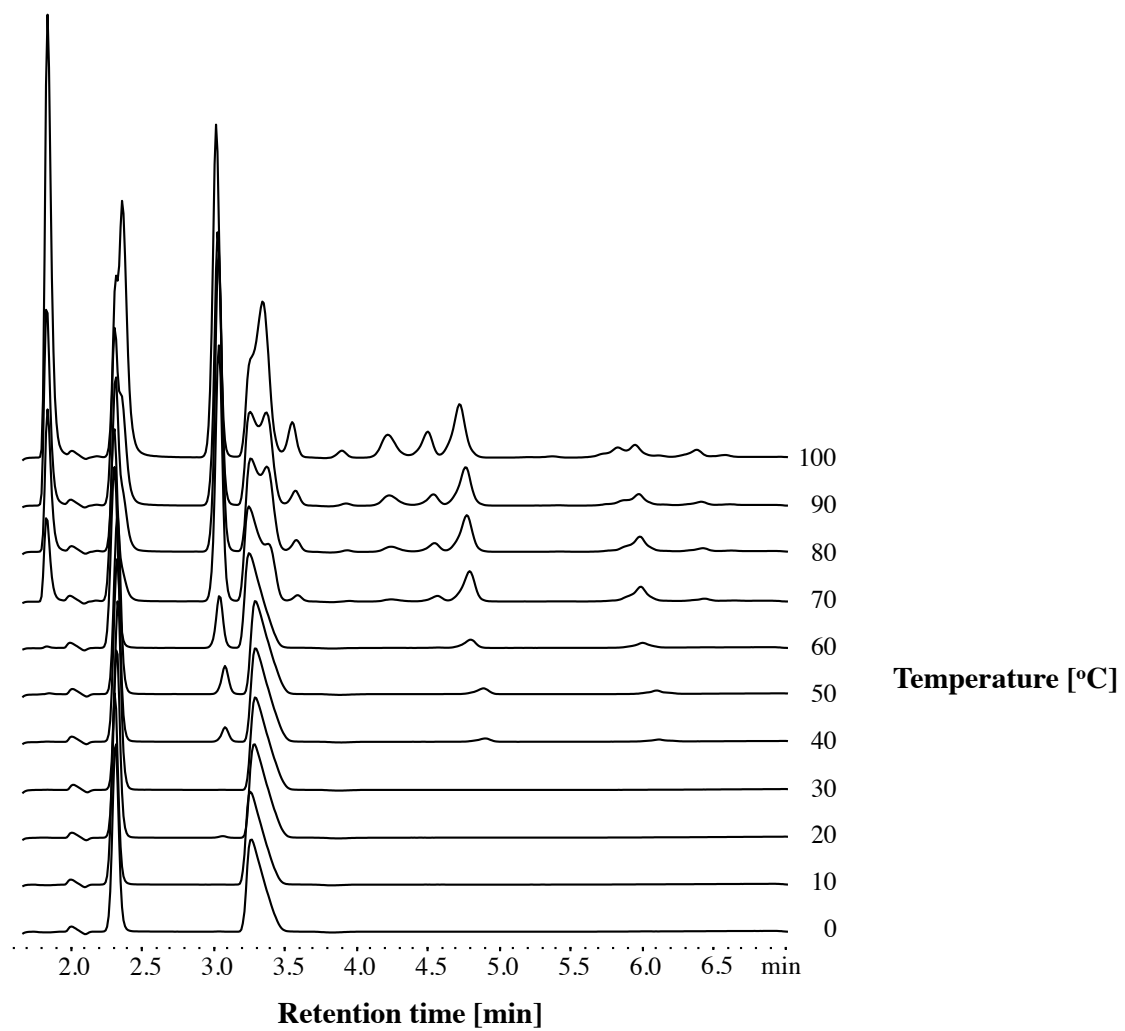

**Fig. S35.** Ion pairing HPLC chromatograms of an alanine and glycine condensation reaction in the presence of TP at pH 4 as a function of temperature.

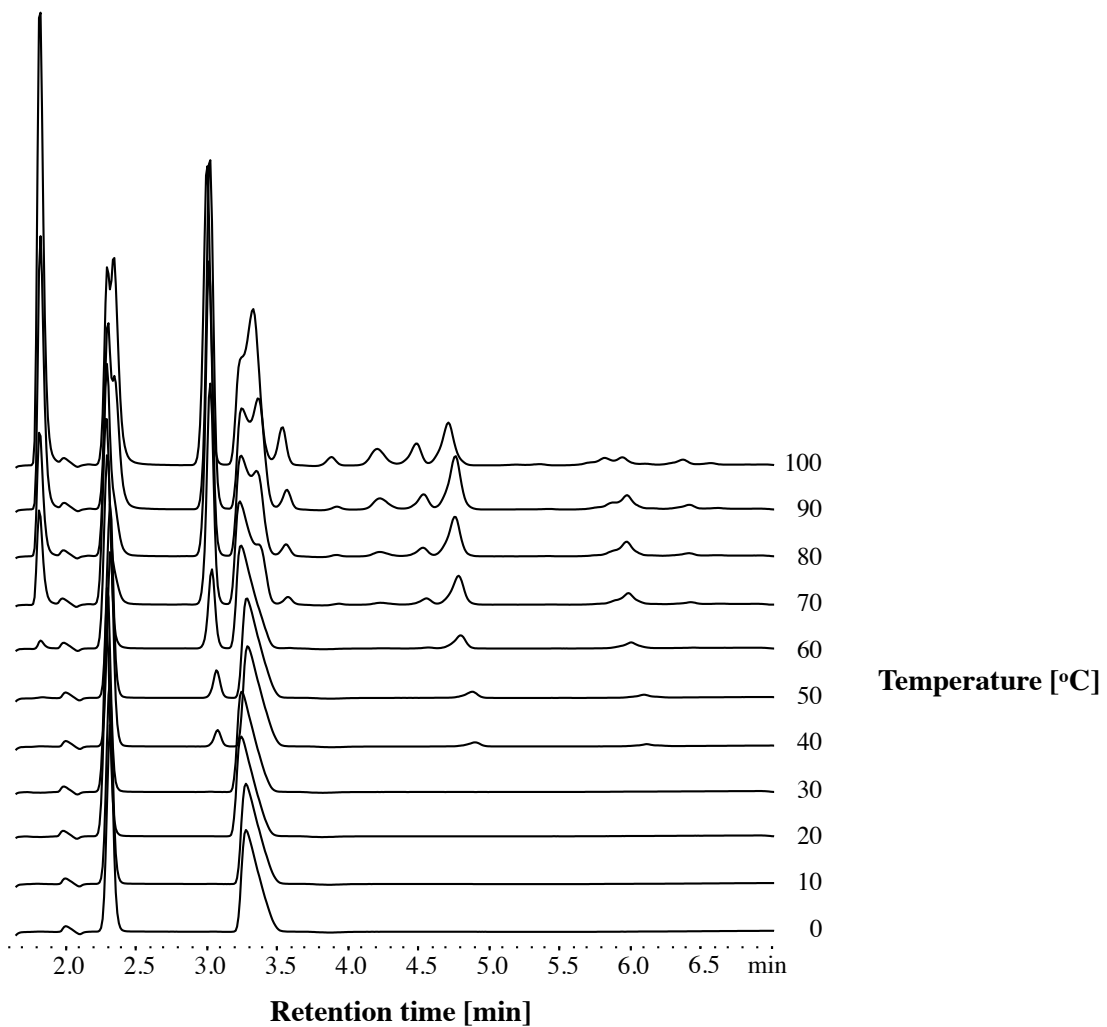

**Fig. S36.** Ion pairing HPLC chromatograms of an alanine and glycine condensation reaction in the presence of TP at pH 5 as a function of temperature.

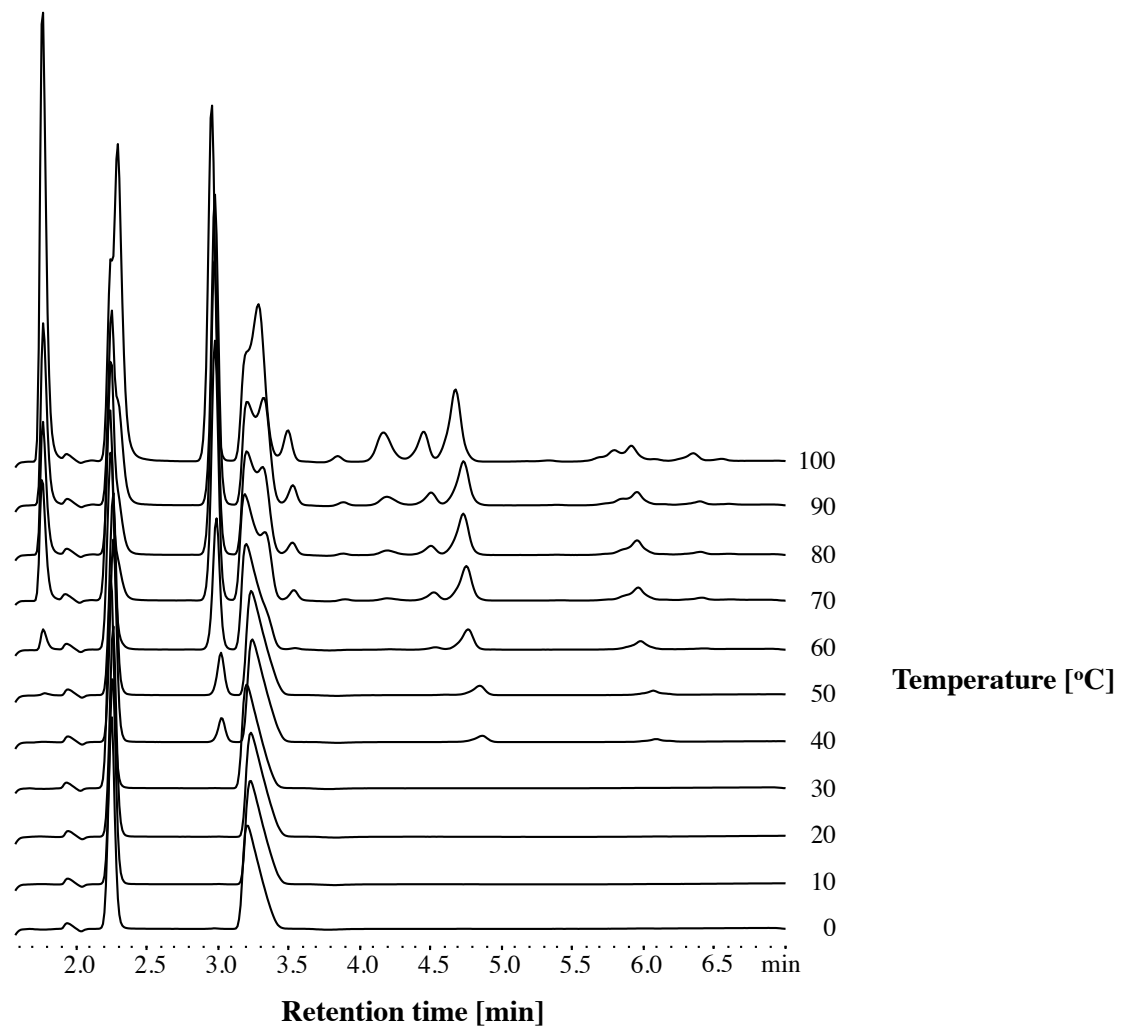

**Fig. S37.** Ion pairing HPLC chromatograms of an alanine and glycine condensation reaction in the presence of TP at pH 6 as a function of temperature.

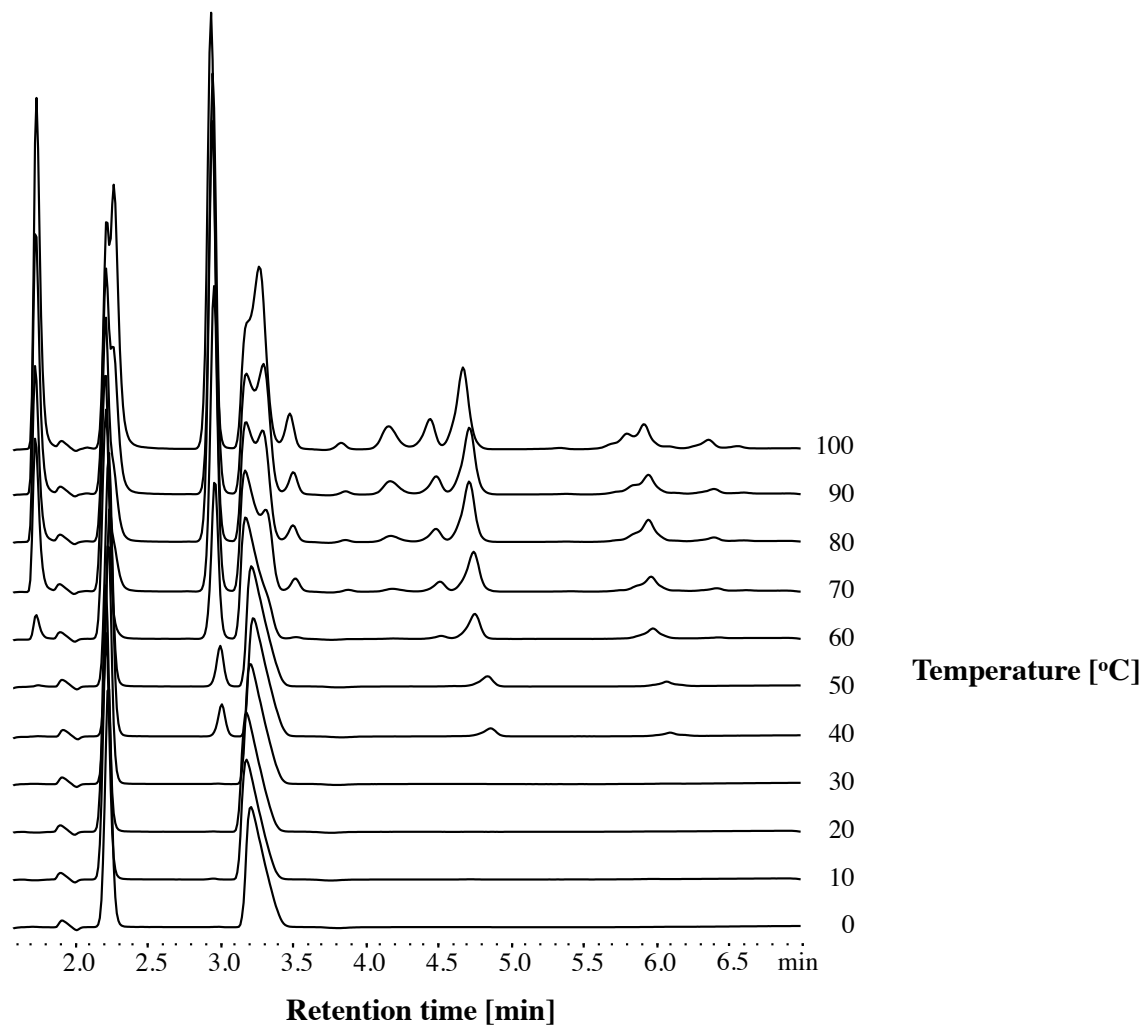

**Fig. S38.** Ion pairing HPLC chromatograms of an alanine and glycine condensation reaction in the presence of TP at pH 7 as a function of temperature.

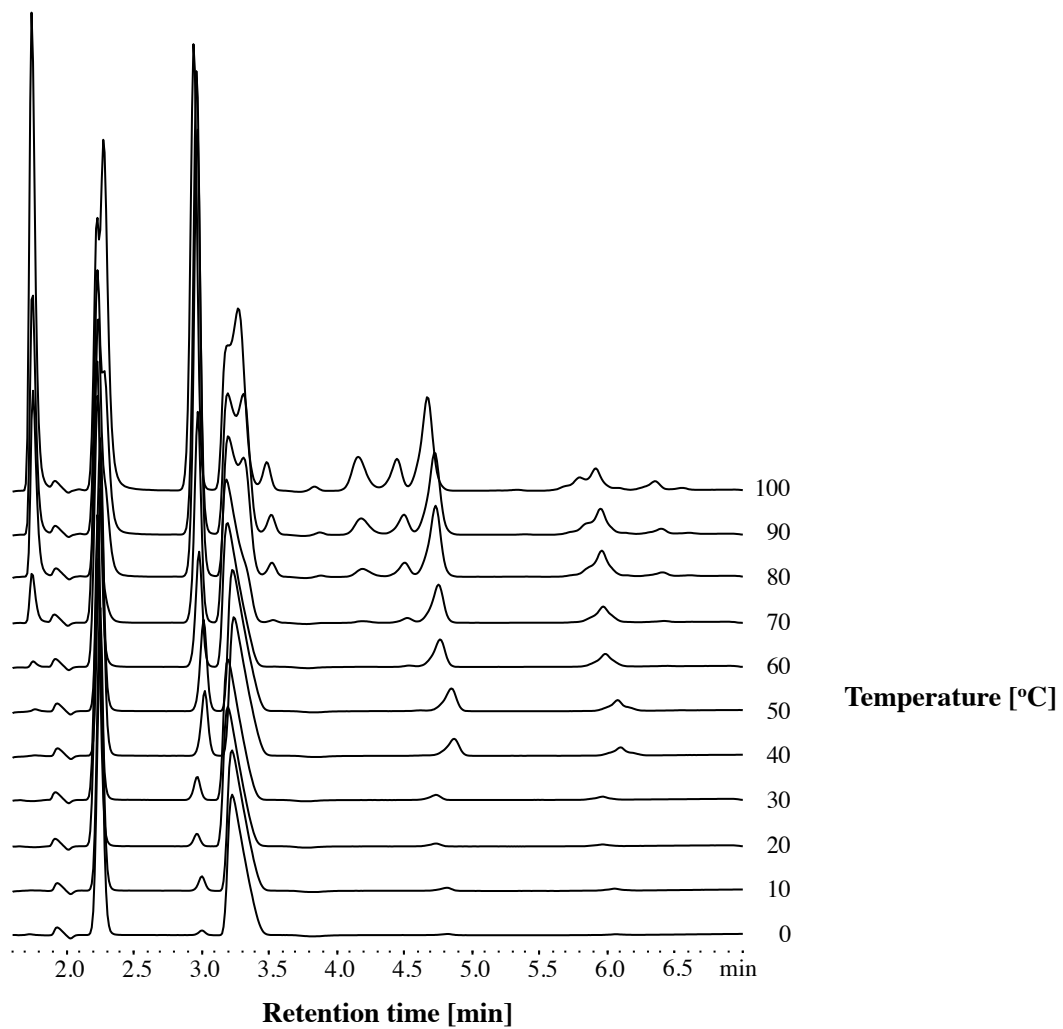

**Fig. S39.** Ion pairing HPLC chromatograms of an alanine and glycine condensation reaction in the presence of TP at pH 8 as a function of temperature.



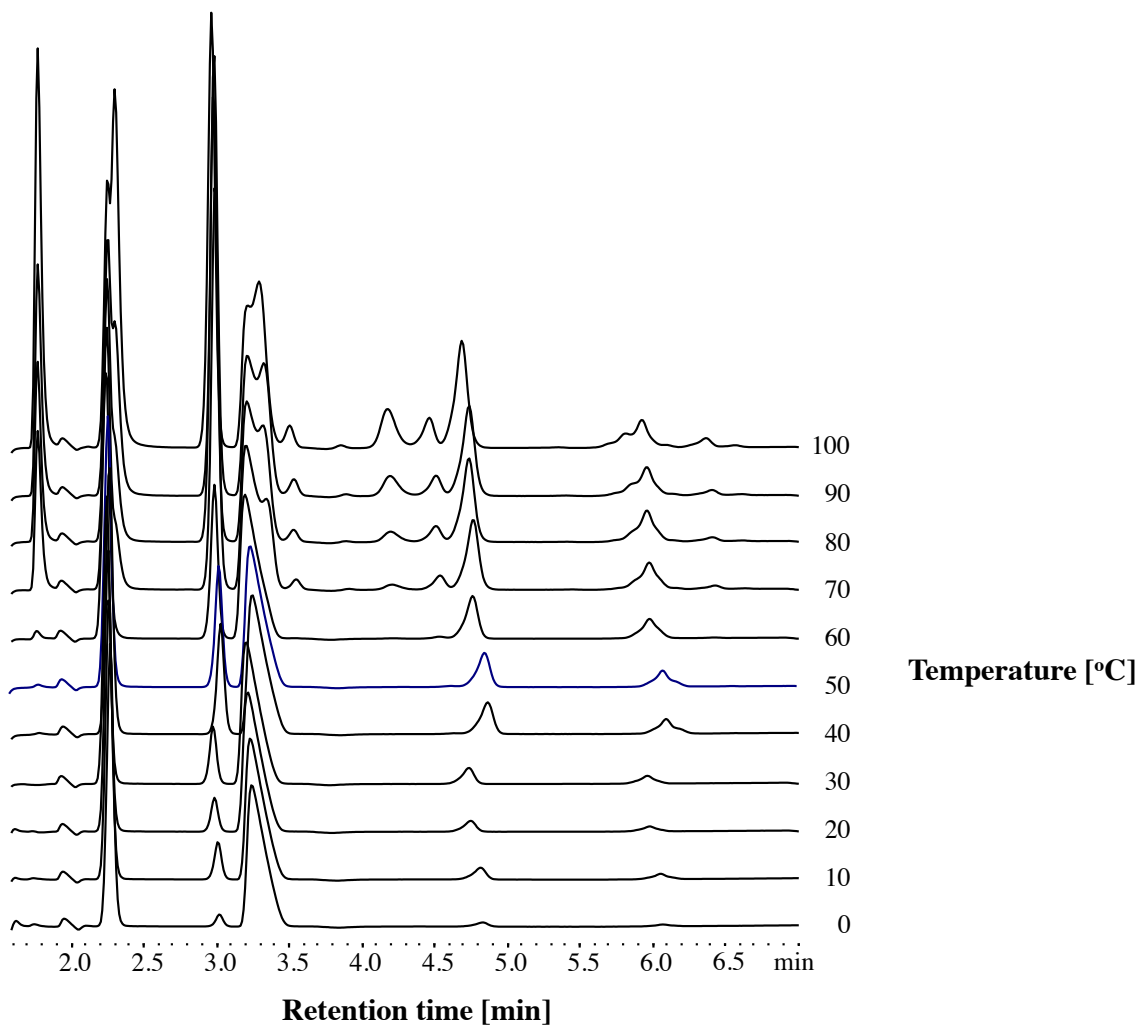

**Fig. S40.** Ion pairing HPLC chromatograms of an alanine and glycine condensation reaction in the presence of TP at pH 9 as a function of temperature.

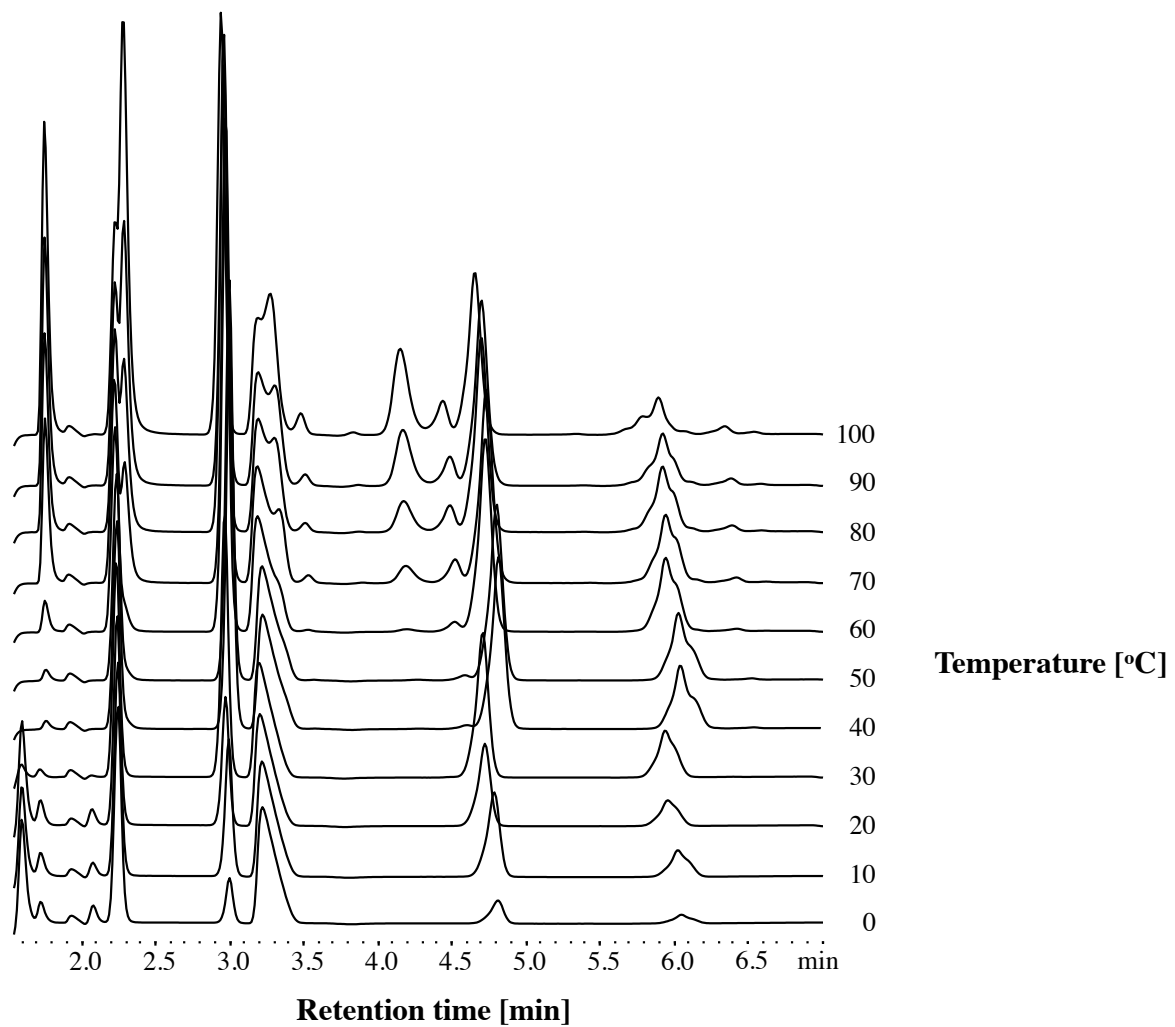

**Fig. S41.** Ion pairing HPLC chromatograms of an alanine and glycine condensation reaction in the presence of TP at pH 10 as a function of temperature.

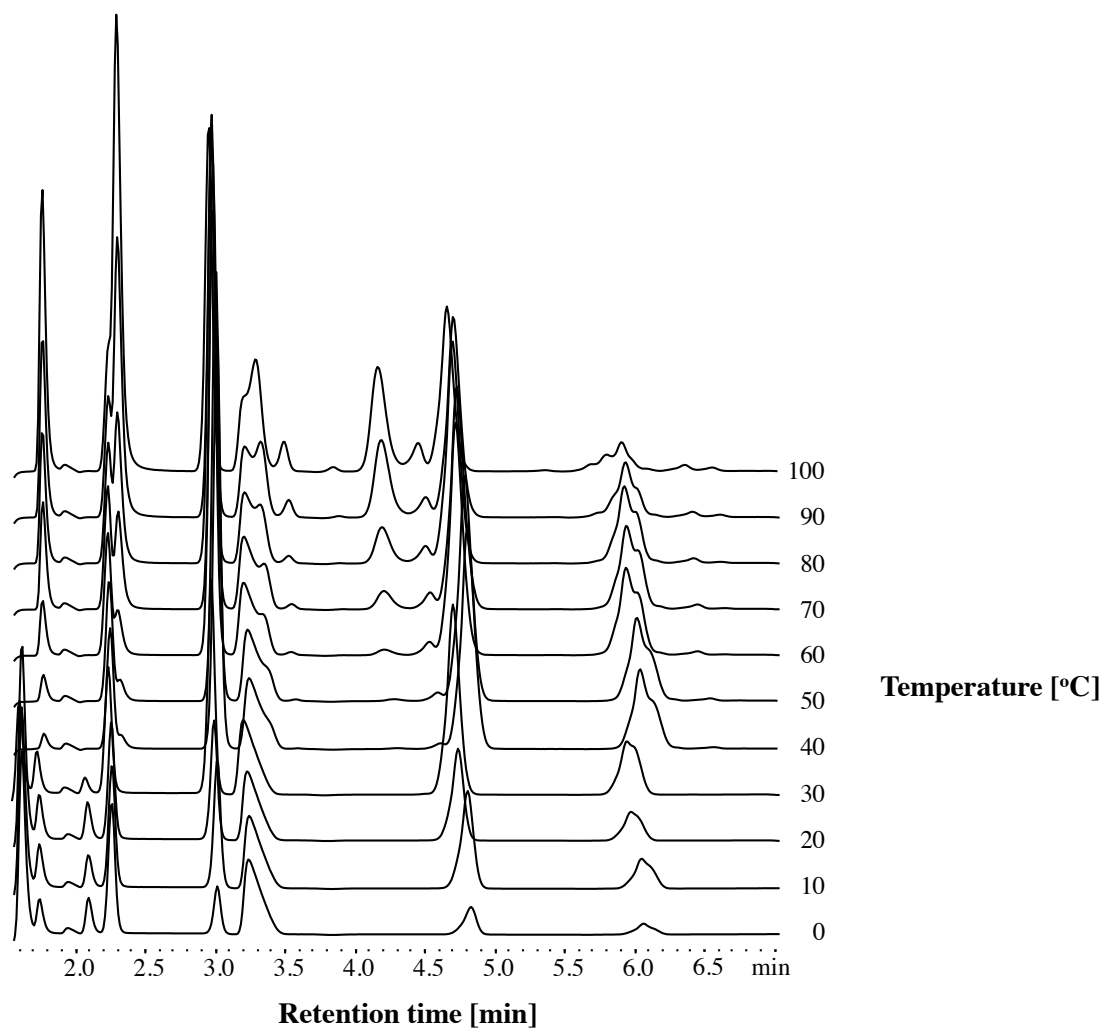

**Fig. S42.** Ion pairing HPLC chromatograms of an alanine and glycine condensation reaction in the presence of TP at pH 11 as a function of temperature.

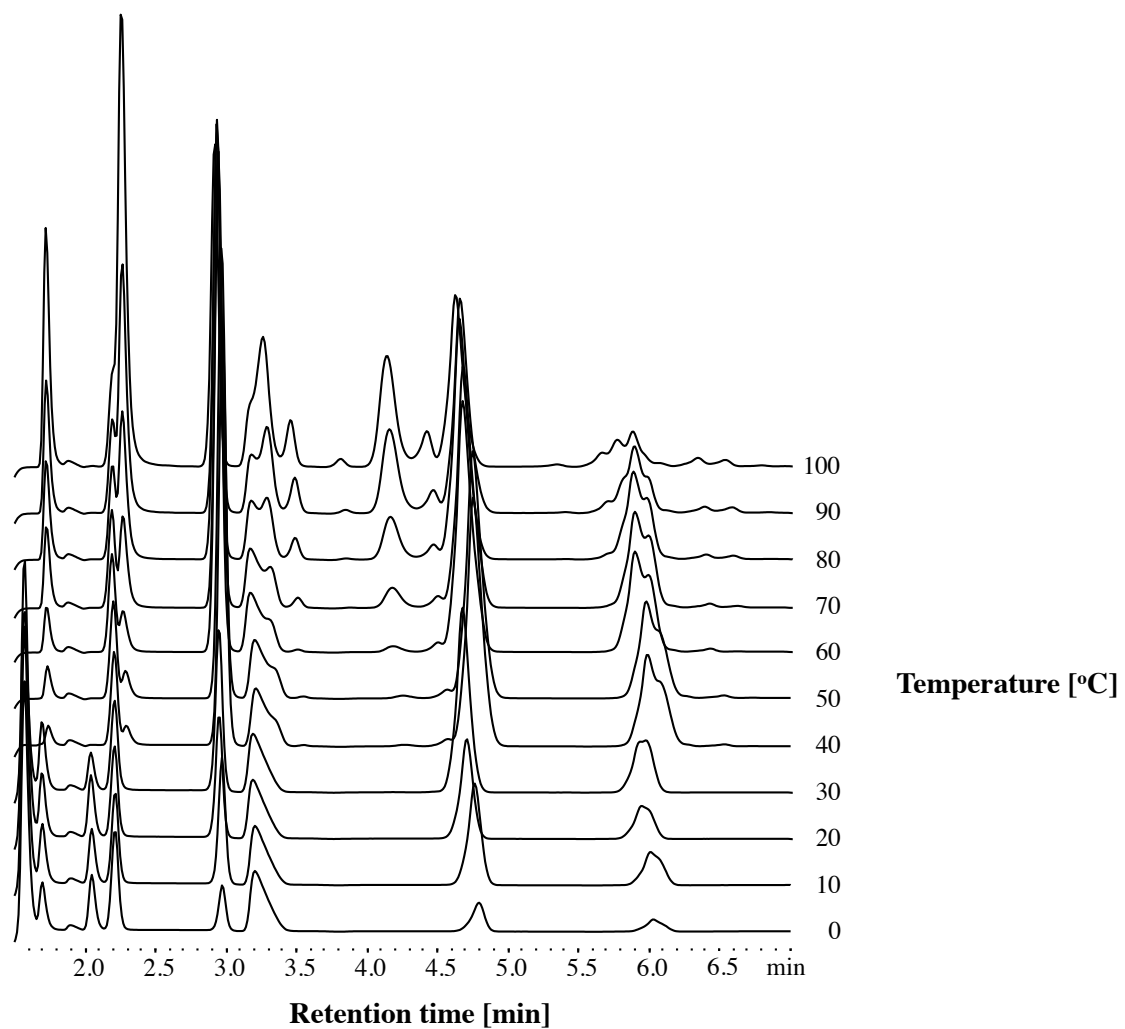

**Fig. S43.** Ion pairing HPLC chromatograms of an alanine and glycine condensation reaction in the presence of TP at pH 12 as a function of temperature.

C2 #1-145 RT: 0.07-9.94 AV: 27 NL: 9.46E3  
F: FTMS + p MALDI Full ms [100.00-1000.00]

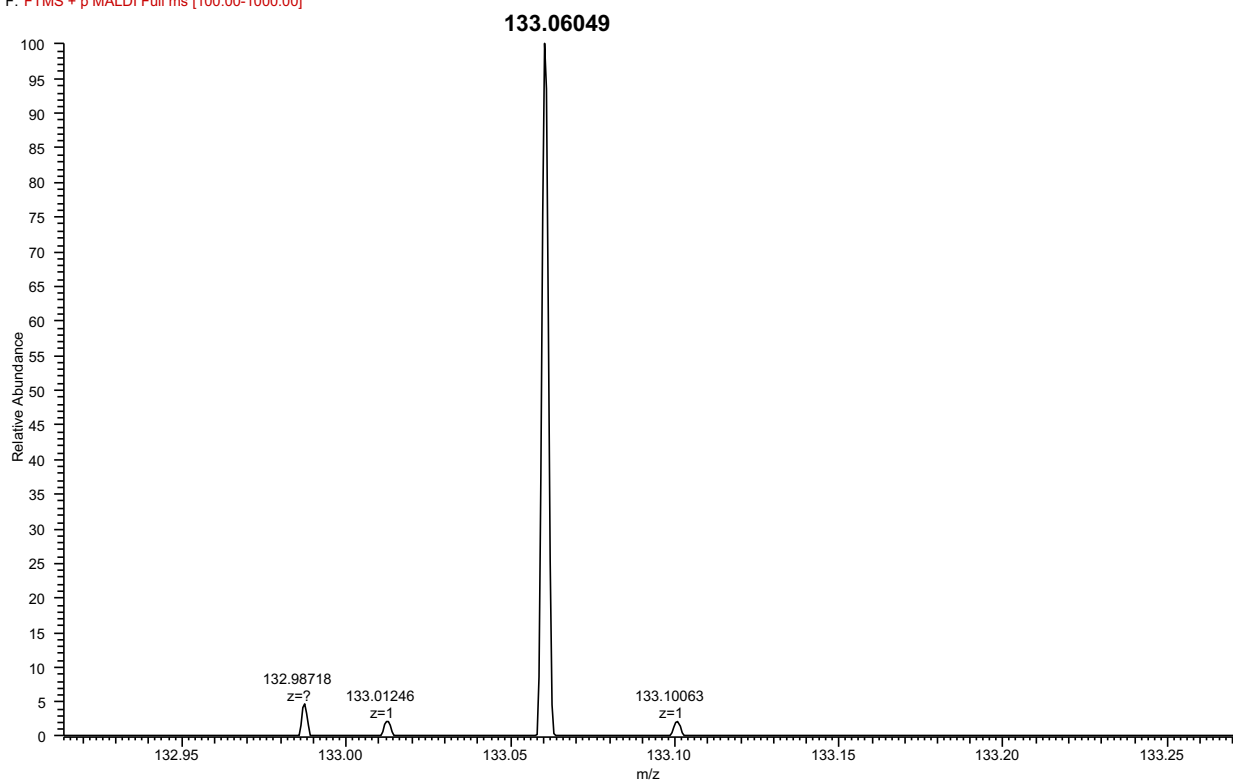

**Fig. S44.** MS spectra for 2G  $[M+H]^+$  oligopeptide.

A+G,90oC, pH9#1-147 RT: 0.07-9.87 AV: 29 NL: 2.94E5  
F: FTMS + p MALDI Full ms [100.00-1000.00]

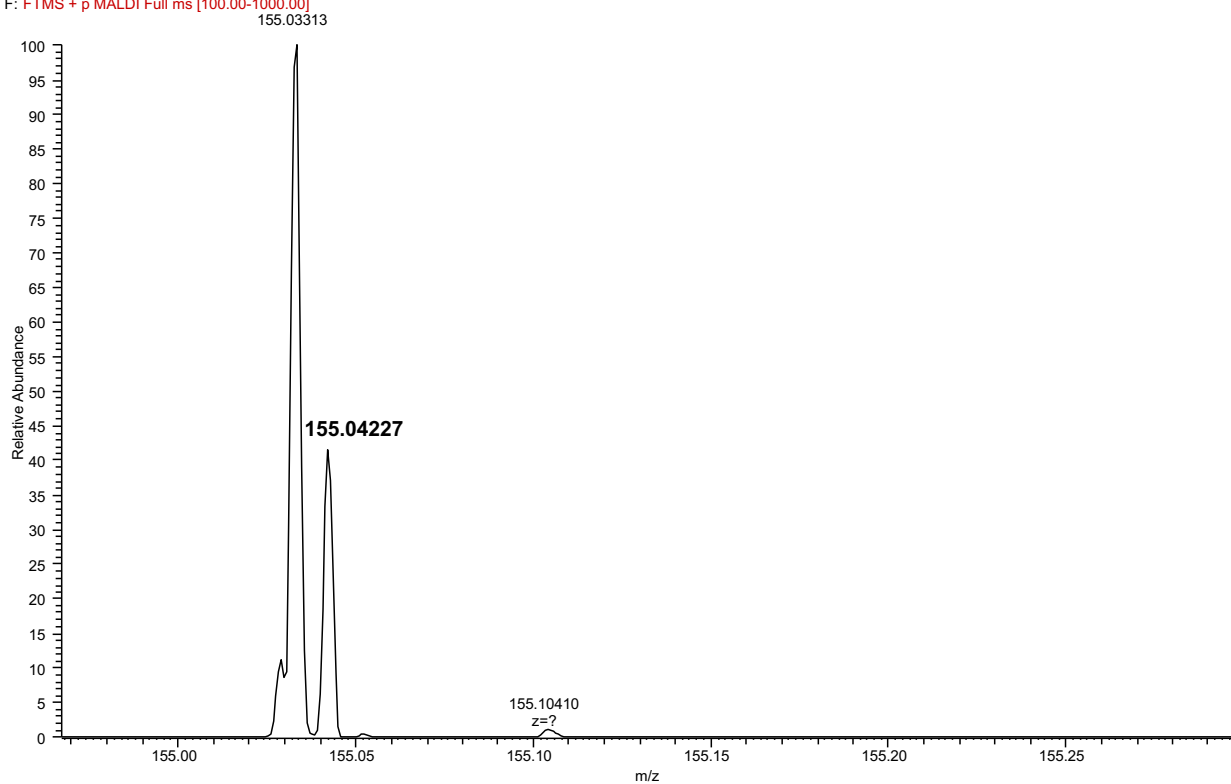

**Fig. S45.** MS spectra for 2G [M+Na]<sup>+</sup> oligopeptide.

A+G,90oC, pH9 #1-147 RT: 0.07-9.87 AV: 29 NL: 1.08E4  
F: FTMS + p MALDI Full ms [100.00-1000.00]

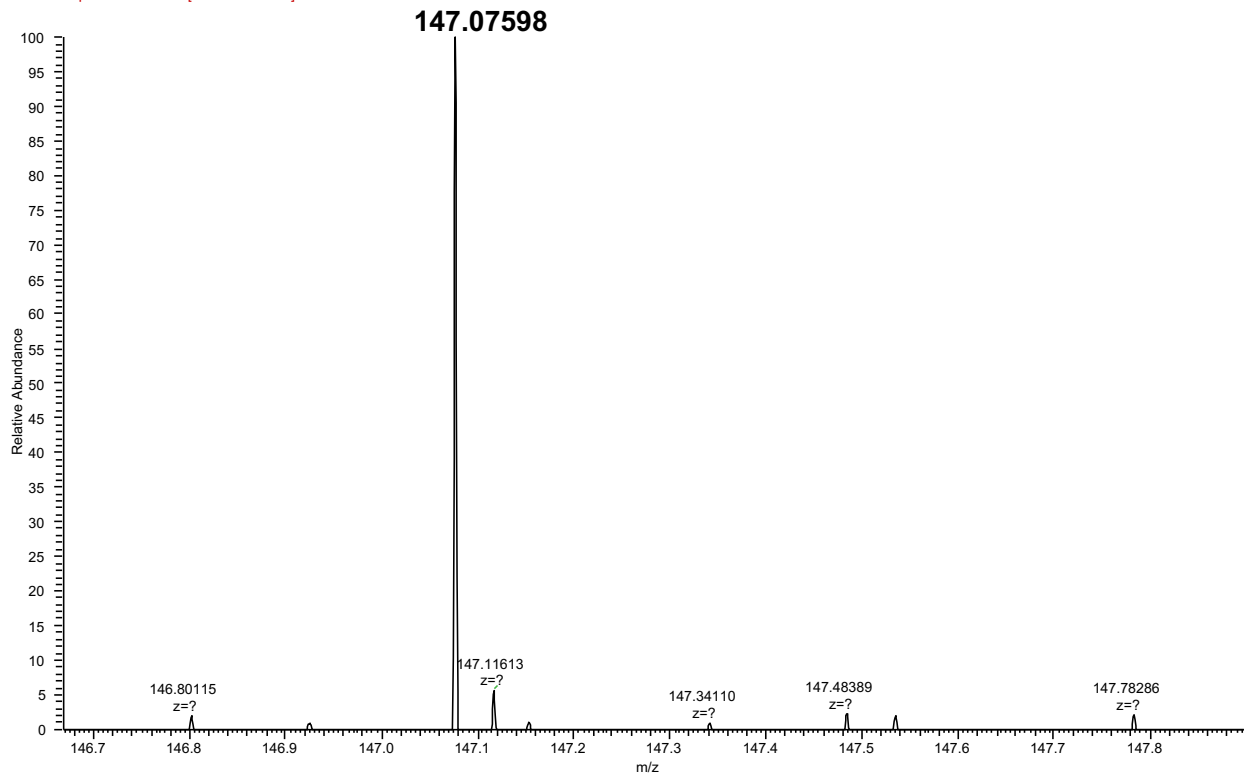

**Fig. S46.** MS spectra for AG  $[M+H]^+$  oligopeptide.

A+G.90oC, pH 1-147 RT:0.07-9.87 AV: 29 NL:3.65E4  
F: FTMS + p MALDI Full ms [100.00-1000.00]

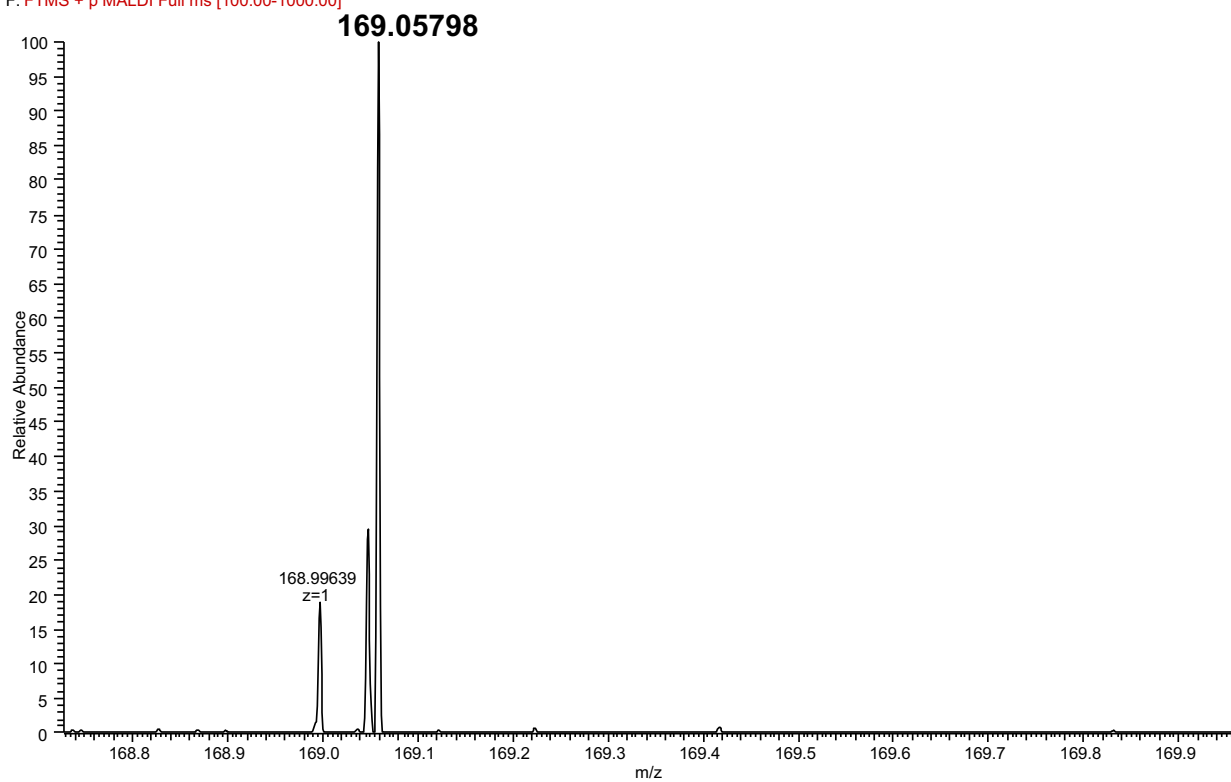

Fig. S47. MS spectra for AG  $[M+Na]^+$  oligopeptide.



AGP.30oC, pH 11 #1-145 RT: 0.07-9.61 AV: 29 NL: 2.35E4  
T: FTMS + p MALDI Full ms [100.00-1000.00]

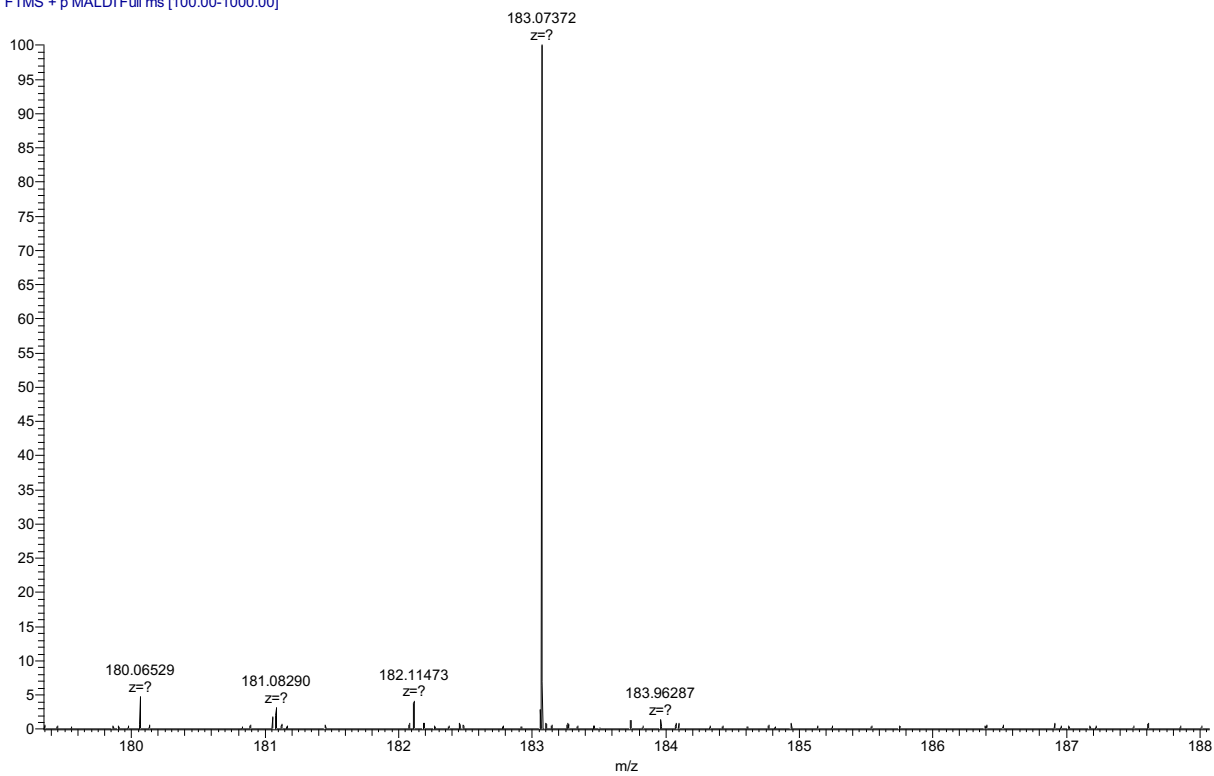

**Fig. S48.** MS spectra for 2A  $[M+Na]^+$  oligopeptide.

A+G,90oC, pH9#1-147 RT: 0.07-9.87 AV: 29 NL: 1.11E4  
F: FTMS + p MALDI Full ms [100.00-1000.00]

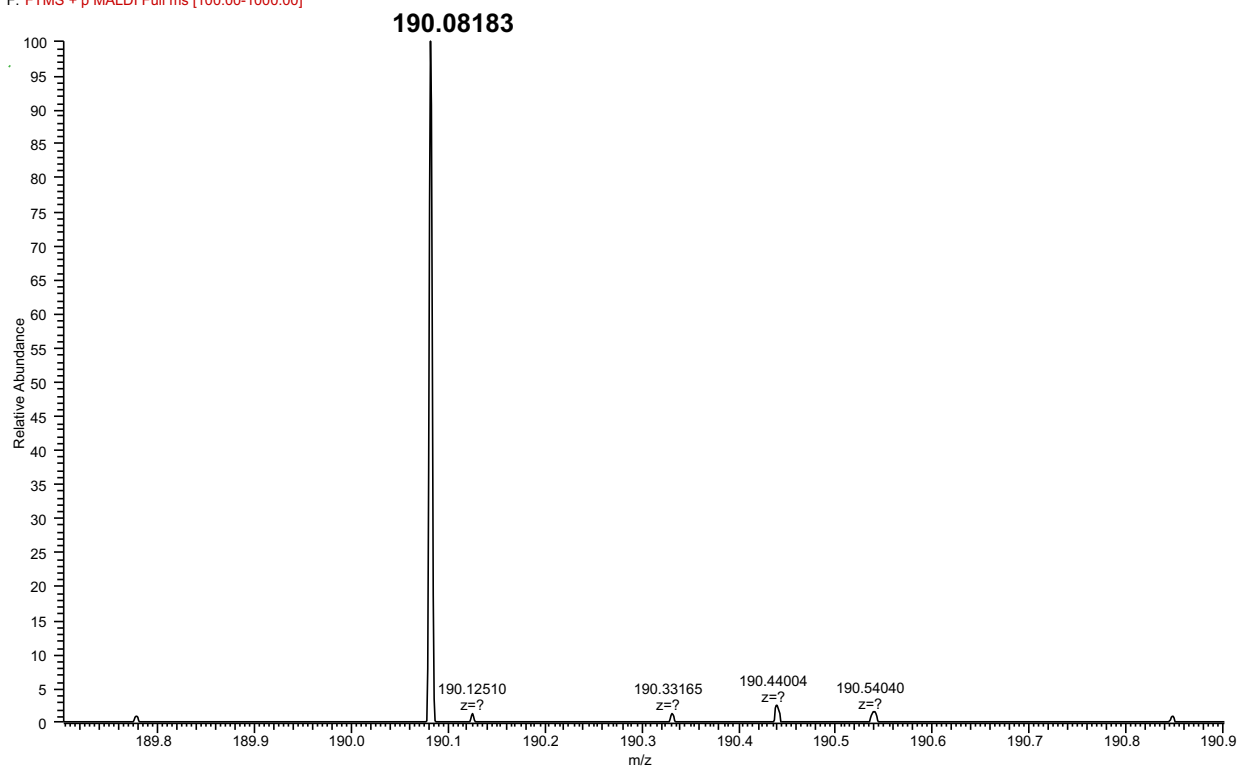

Fig. S49. MS spectra for 3G [M+H]<sup>+</sup> oligopeptide.

C2 #1-145 RT: 0.07-9.94 AV: 27 NL: 7.91E4  
T: FTMS + p MALDI Full ms [100.00-1000.00]

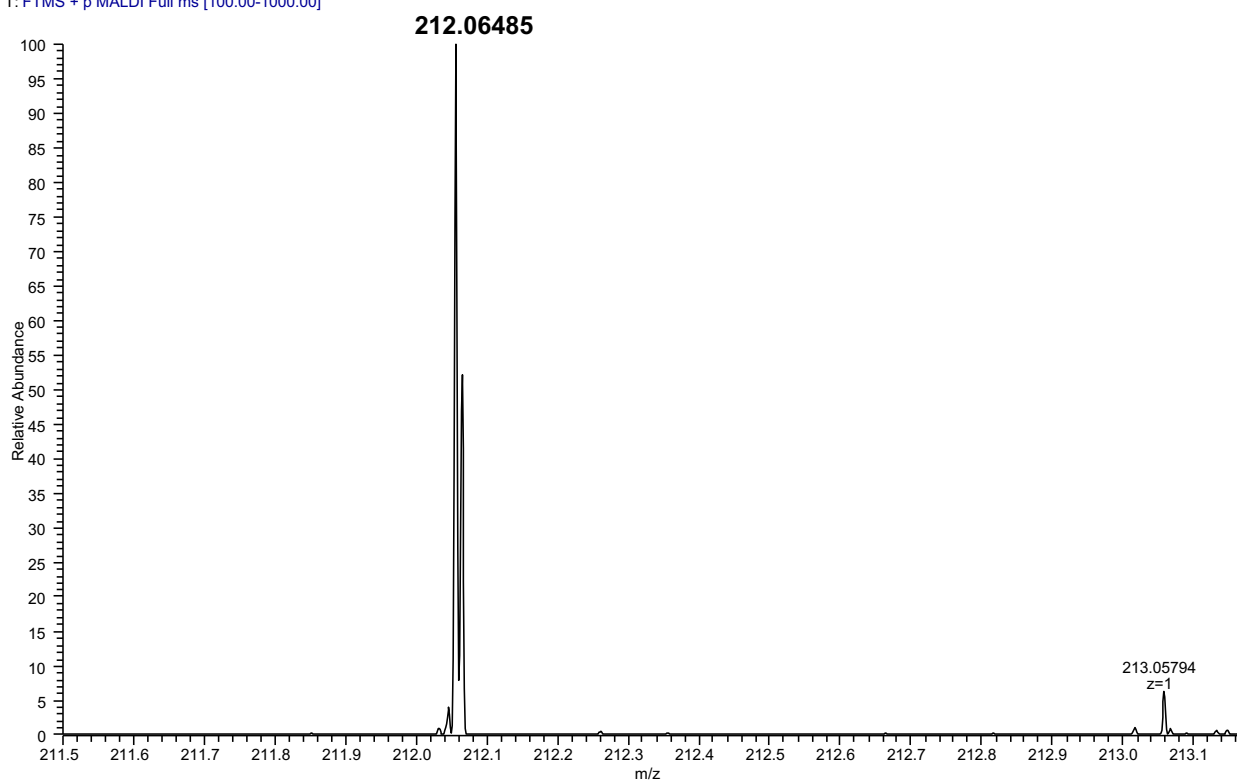

**Fig. S50.** MS spectra for 3G  $[M+Na]^+$  oligopeptide.

A+G,100oC, pH#1-146 RT:0.07-9.95 AV: 32 NL: 4.82E3  
T: FTMS + p MALDI Full ms [100.00-1000.00]

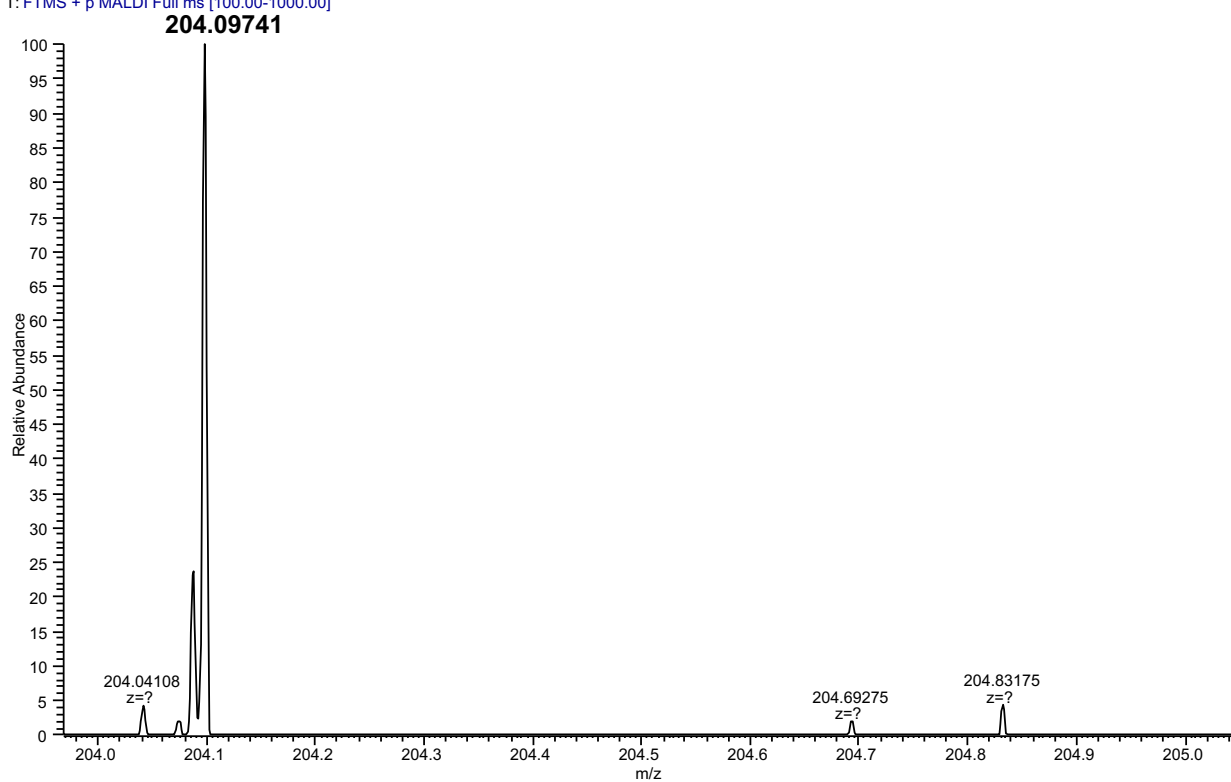

Fig. S51. MS spectra for 2GA  $[M+H]^+$  oligopeptide.

A+G, 100oC, pH9 #1-146 RT: 0.07-9.95 AV: 32 NL: 2.31E5  
T: FTMS + p MALDI Full ms [100.00-1000.00]

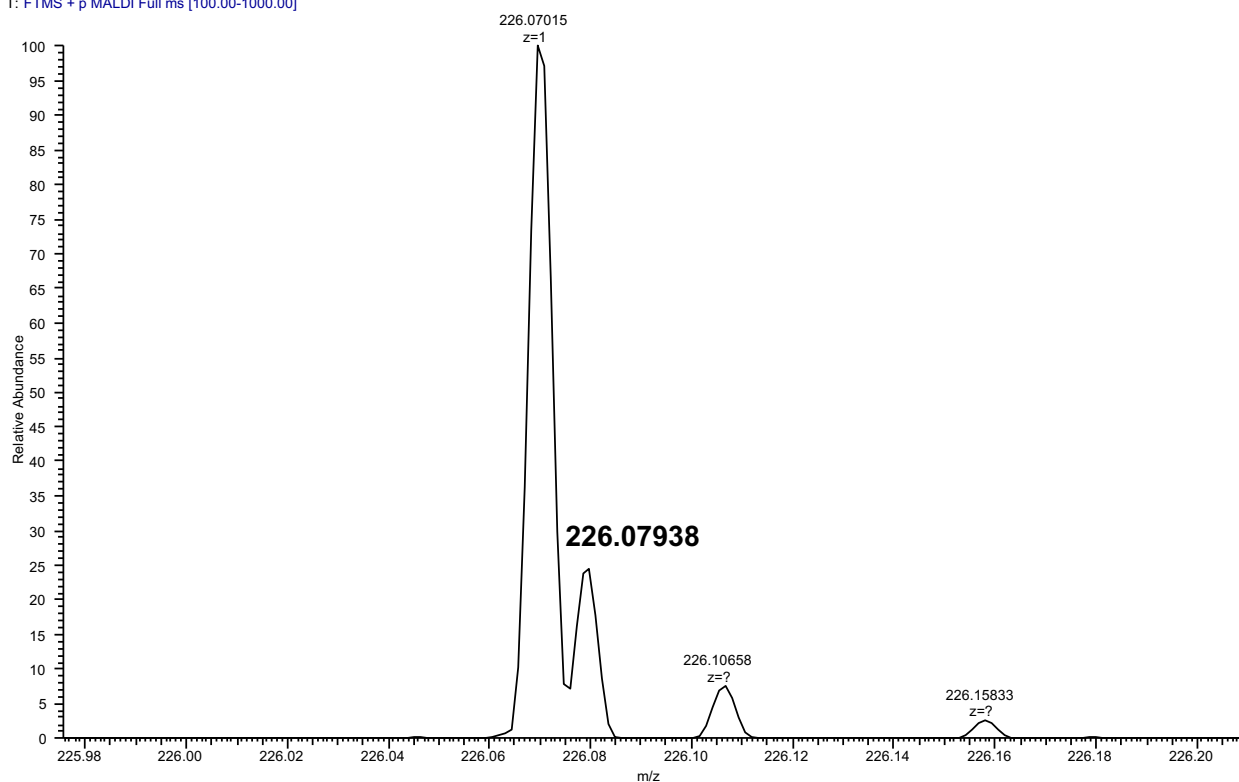

**Fig. S52.** MS spectra for 2GA  $[M+Na]^+$  oligopeptide.

A+G.90oC, pH9 #1-147 RT: 0.07-9.87 AV: 29 NL: 2.17E4  
F: FTMS + p MALDI Full ms [100.00-1000.00]

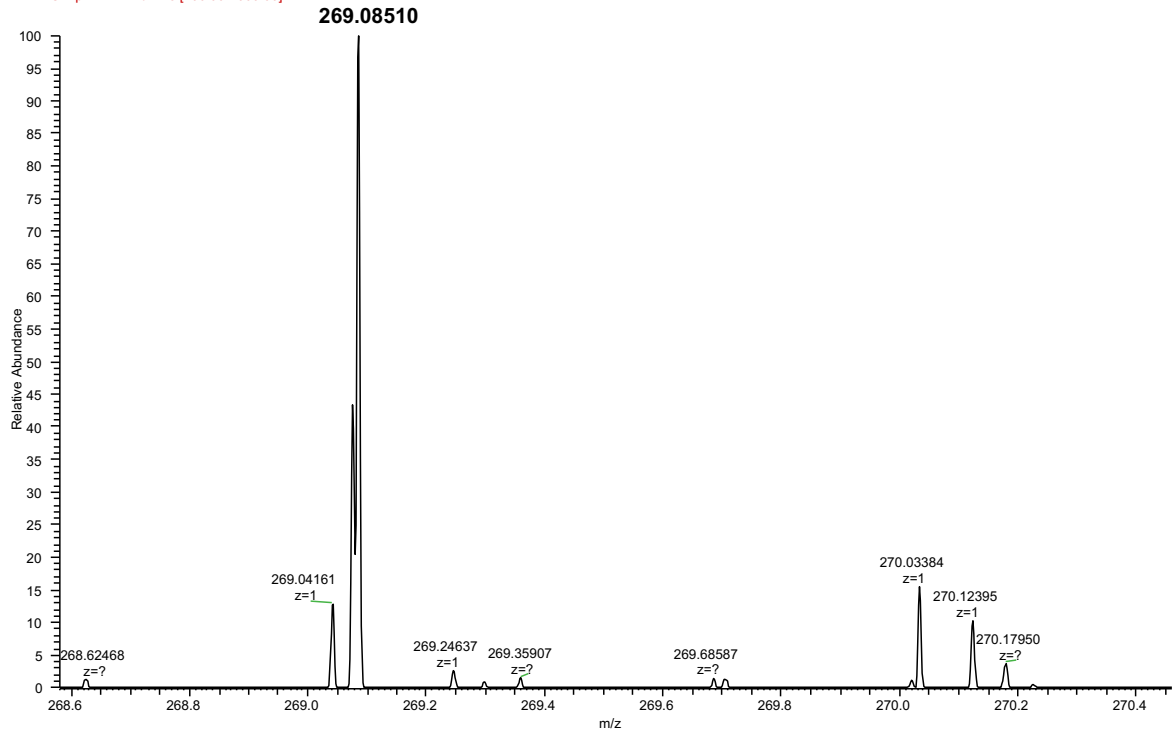

Fig. S53. MS spectra for 4G  $[M+Na]^+$  oligopeptide.

C6 #140 RT: 9.57 AV: 1 NL: 6.62E5  
T: FTMS + p MALDI d Full ms2 212.05@hcd35.00 [75.00-225.00]

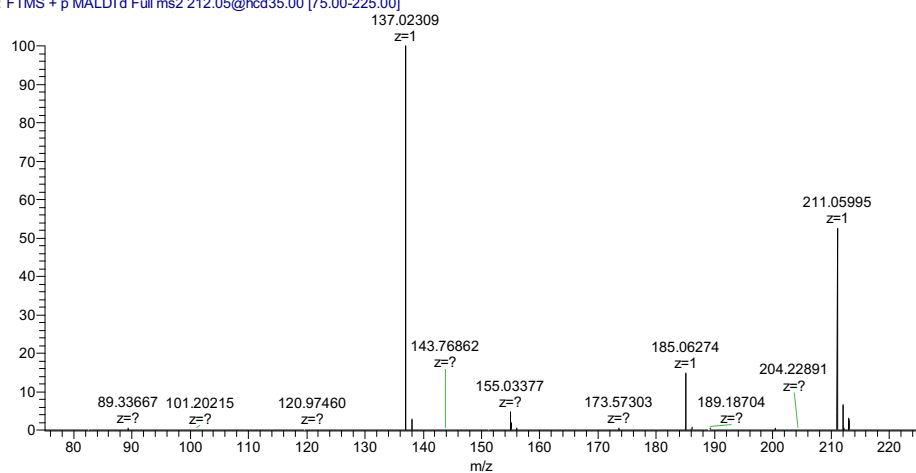

**Fig. S54.** MS/MS spectra for 3G  $[M+Na]^+$  oligopeptide.

C6 #134 RT: 9.15 AV: 1 NL: 6.93E4  
T: FTMS + p MALDI d Full ms2 226.07@hcd35.00 [75.00-240.00]

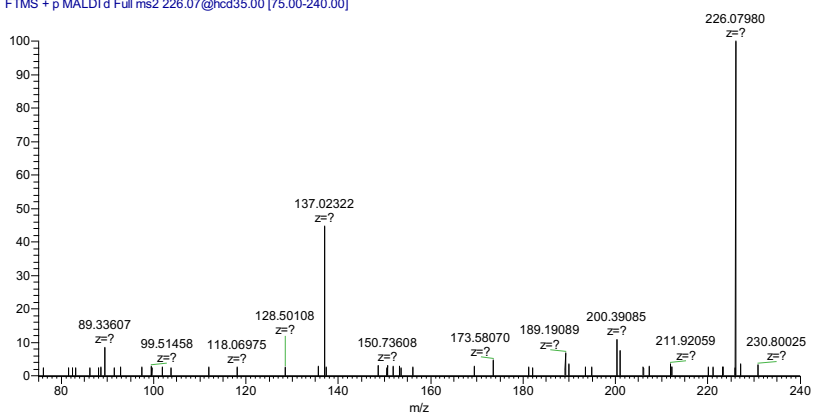

**Fig. S55.** MS/MS spectra for GGA  $[M+Na]^+$  oligopeptide.



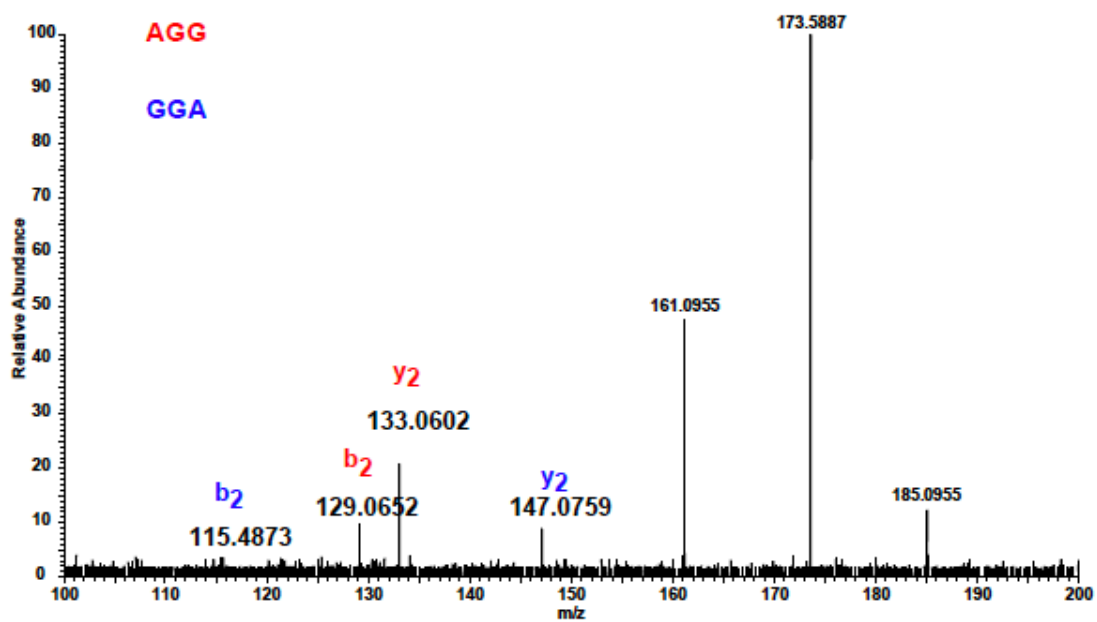

Fig. S56. MS/MS spectra for AGG and GGA [M+H]<sup>+</sup> oligopeptide mix.
